# Supplementary material for: Efficacy of a nurse-led sexual rehabilitation intervention for women with gynaecological cancers receiving radiotherapy: results of a randomised trial
Source: PubMed Central journal article supplement (PMC11369252; doi:10.1038/s41416-024-02775-8), 2024-07-03
Supplement: 41416_2024_2775_MOESM1_ESM.pdf [file 41416_2024_2775_MOESM1_ESM.pdf]

## Supplementary Materials

| <b>Supplementary appendix 1 Participating centres including study teams</b> |                                                                      |                                                                                                             |                                               |
|-----------------------------------------------------------------------------|----------------------------------------------------------------------|-------------------------------------------------------------------------------------------------------------|-----------------------------------------------|
| <b>Centre</b>                                                               | <b>Principle Investigator<br/>(and Associated<br/>Investigators)</b> | <b>Nurses</b>                                                                                               | <b>Supervisors</b>                            |
| Amsterdam Medical Center                                                    | Henrike Westerveld                                                   | Wilma van der Ham-Paalman<br>Sandra Diergaarde<br>Wendy Lesterhuis                                          | Ellen Laan†<br>Hanneke Termeer                |
| Catharina Hospital                                                          | Jeltsje Cnossen<br>Hetty van den Berg                                | Noor Vincent<br>Ivonne Oomen                                                                                | Rian Brus<br>Simone Speelman                  |
| Erasmus Medical Center                                                      | Jan Willem Mens<br>Helena van Doorn<br>Remi Nout                     | Claudia Mangelaars<br>Karin Dupree<br>Nicoline Schuur – van 't Hof<br>Sabine Blom<br>Christel de Jager-Blom | Hanneke Bolt                                  |
| Leiden University Medical Center                                            | Carien Creutzberg<br>Cor de Kroon<br>Laura Velema                    | Corine de Jong<br>Mirjam Laman                                                                              | Charlotte Tuijnman-Raasveld<br>Ellen de Groot |
| Maastrou                                                                    | Ludy Lutgens                                                         | Moniek Kamps<br>Charlotte Penders                                                                           | Reinhilde Melles                              |
| Netherlands Cancer Institute                                                | Marlies Nowee                                                        | Kirsten de Greef<br>Erin Gardebroek-de Boer                                                                 | Ilaniek Zantingh                              |
| Radboud University Medical Center                                           | An Snyers                                                            | Annemieke Janssens<br>Lotte Knapen                                                                          | Marianne Vergeer                              |
| Radiotherapiegroep                                                          | Dorien Haverkort                                                     | Janine de Neeff<br>Truus Kroeze                                                                             | Irma Bosman                                   |
| University Medical Center Groningen                                         | Jannet Beukema                                                       | Bianca Kramer-Medema<br>Nina van Linde                                                                      | Ria Bosgraaf                                  |
| University Medical Center Utrecht                                           | Ina Jurgenliemk-Schulz                                               | Nicole van den Berg<br>Catharina van der Linden-Hunziker<br>Ankie Krol Veraar                               | Ilaniek Zantingh                              |

**Supplementary appendix 2 Additional patient and physician-reported outcomes**

| Variable                                                                            | Questionnaire           | Clinical cut-off score |
|-------------------------------------------------------------------------------------|-------------------------|------------------------|
| Sexual functioning                                                                  | FSFI                    | ≤26-55                 |
| Sexual desire                                                                       | FSFI                    | NA                     |
| Sexual arousal                                                                      | FSFI                    | NA                     |
| Vaginal lubrication                                                                 | FSFI                    | NA                     |
| Orgasmic function                                                                   | FSFI                    | NA                     |
| Sexual satisfaction                                                                 | FSFI                    | NA                     |
| Sexual pain                                                                         | FSFI                    | NA                     |
| Sexual distress                                                                     | FSDS                    | ≥15                    |
| Symptom experience                                                                  | EORTC QLQ-CX24          | NA                     |
| Body image                                                                          | EORTC QLQ-CX24/QLQ-EN24 | NA                     |
| Sexual/vaginal functioning (dryness, shortness, tightness, pain during intercourse) | EORTC QLQ-CX24/QLQ-EN24 | NA                     |
| Vaginal tightness                                                                   | EORTC QLQ-CX24/QLQ-EN24 | NA                     |
| Lymphedema                                                                          | EORTC QLQ-CX24/QLQ-EN24 | NA                     |
| Peripheral neuropathy                                                               | EORTC QLQ-CX24          | NA                     |
| Menopausal symptoms                                                                 | EORTC QLQ-CX24          | NA                     |
| Sexual worry                                                                        | EORTC QLQ-CX24          | NA                     |
| Sexual activity                                                                     | EORTC QLQ-CX24/QLQ-EN24 | NA                     |
| Sexual enjoyment                                                                    | EORTC QLQ-CX24/QLQ-EN24 | NA                     |
| Urological symptoms                                                                 | EORTC QLQ-EN24          | NA                     |
| Gastrointestinal symptoms                                                           | EORTC QLQ-EN24/QLQ-EN24 | NA                     |
| Sexual interest                                                                     | EORTC QLQ-EN24          | NA                     |
| Fear of non-penetration sexual activity                                             | FSQ                     | NA                     |
| Fear of coitus/vaginal penetration                                                  | FSQ                     | NA                     |
| Relationship dissatisfaction                                                        | MMQ                     | ≥20                    |
| Psychological distress                                                              | HADS                    | ≥14                    |
| Depression                                                                          | HADS                    | ≥7                     |
| Anxiety                                                                             | HADS                    | ≥7                     |
| Physical function                                                                   | EORTC QLQ-C30           | NA                     |
| Role function                                                                       | EORTC QLQ-C30           | NA                     |
| Emotional function                                                                  | EORTC QLQ-C30           | NA                     |
| Cognitive function                                                                  | EORTC QLQ-C30           | NA                     |
| Social function                                                                     | EORTC QLQ-C30           | NA                     |
| Fatigue                                                                             | EORTC QLQ-C30           | NA                     |
| Nausea/vomiting                                                                     | EORTC QLQ-C30           | NA                     |
| Pain                                                                                | EORTC QLQ-C30           | NA                     |
| Dyspnoea                                                                            | EORTC QLQ-C30           | NA                     |
| Sleep disturbance                                                                   | EORTC QLQ-C30           | NA                     |
| Appetite loss                                                                       | EORTC QLQ-C30           | NA                     |
| Constipation                                                                        | EORTC QLQ-C30           | NA                     |
| Diarrhoea                                                                           | EORTC QLQ-C30           | NA                     |
| Financial impact                                                                    | EORTC QLQ-C30           | NA                     |
| Global QoL                                                                          | EORTC QLQ-C30           | NA                     |
| Treatment related stress – intrusion                                                | IES                     | NA                     |
| Treatment related stress – avoidance                                                | IES                     | NA                     |
| Cost-effectiveness                                                                  |                         |                        |
| Sexual health care use                                                              | -                       | NA                     |
| Quality of life                                                                     | EQ-5D-5L                | NA                     |
| Credibility of analogue therapy rationales                                          | CEQ                     | NA                     |
| Physician-reported Bleeding                                                         | CTCAE                   | ≥grade 3 = severe      |
| Physician-reported Mucositis                                                        | CTCAE                   | ≥grade 3 = severe      |
| Physician-reported Discharge                                                        | CTCAE                   | ≥grade 3 = severe      |
| Physician-reported Fibrosis                                                         | CTCAE                   | ≥grade 3 = severe      |
| Physician-reported Atrophy/telangiectasia                                           | CTCAE                   | ≥grade 3 = severe      |
| Physician-reported Pain                                                             | CTCAE                   | ≥grade 3 = severe      |
| Physician-reported Dyspareunia                                                      | CTCAE                   | ≥grade 3 = severe      |
| Physician-reported vaginal estradiol/estriol                                        | CRF                     | NA                     |
| Physician-reported hormone replacement therapy                                      | CRF                     | NA                     |

*Note.* CEQ = Credibility/Expectancy Questionnaire; CRF = Case Report Form; CTCAE = Common Terminology Criteria for Adverse Events; EORTC QLQ-C30 = European Organization for Research and Treatment of Cancer Quality of Life Questionnaire-Core 30; EORTC QLQ-CX24 = European Organization for Research and Treatment of Cancer Quality of Life Questionnaire-Gynaecological Cancer Module; EORTC QLQ-EN24 = European Organization for Research and Treatment of Cancer Quality of Life Questionnaire-Endometrial Cancer Module; EQ-5D-5L = EuroQol 5D-5L; FSDS = Female Sexual Distress Scale; FSFI = Female Sexual Function Index; FSQ = Fear of Sexuality Questionnaire; HADS = Hospital Anxiety and Depression Scale; IES = Impact of Event Scale; MMQ = Maudsley Marital Questionnaire; NA = not applicable

**Supplementary appendix 3 Total and subscale mean values at retrospective baseline (for FSFI and FSDS) 1, 3, 6 and 12 months after radiotherapy and GLMM likelihood ratio test outcomes of primary and secondary continuous outcome measures**

| Outcome measure (range score) | Assessment |         |      |     |         |       |     |         |      |    |         |      | GLMM outcomes |         |       |         |                   |      |
|-------------------------------|------------|---------|------|-----|---------|-------|-----|---------|------|----|---------|------|---------------|---------|-------|---------|-------------------|------|
|                               | T1         |         |      | T2  |         |       | T3  |         |      | T4 |         |      | T5            |         |       | LRT(df) | P (overall model) |      |
|                               | N          | M/<br>% | SD   | N   | M/<br>% | SD    | N   | M/<br>% | SD   | N  | M/<br>% | SD   | N             | M/<br>% | SD    |         |                   |      |
| <b>Primary</b>                |            |         |      |     |         |       |     |         |      |    |         |      |               |         |       |         |                   |      |
| Sexual functioning            |            |         |      |     |         |       |     |         |      |    |         |      |               |         |       |         |                   |      |
| FSFI total (2-36)             |            |         |      |     |         |       |     |         |      |    |         |      |               |         |       |         | 10-88(10)         | 0-37 |
| Intervention                  | 112        | 28.08   | 6.48 | 108 | 18.36   | 10.27 | 106 | 21.98   | 9.45 | 98 | 23.82   | 8.83 | 94            | 22.57   | 9.30  |         |                   |      |
| Care-as-usual                 | 117        | 28.30   | 7.07 | 110 | 17.38   | 10.64 | 106 | 22.26   | 9.10 | 98 | 22.89   | 8.74 | 87            | 21.76   | 10.42 |         |                   |      |
| Sexual desire                 |            |         |      |     |         |       |     |         |      |    |         |      |               |         |       |         |                   |      |
| FSFI sexual desire (1-2-6)    |            |         |      |     |         |       |     |         |      |    |         |      |               |         |       |         | 7.59(10)          | 0.67 |
| Intervention                  | 112        | 3.81    | 0.99 | 108 | 2.92    | 1.25  | 106 | 3.05    | 1.27 | 99 | 3.31    | 1.30 | 94            | 2.99    | 1.32  |         |                   |      |
| Care-as-usual                 | 117        | 3.76    | 0.99 | 110 | 2.80    | 1.24  | 106 | 2.99    | 1.23 | 98 | 3.04    | 1.18 | 88            | 3.08    | 1.34  |         |                   |      |
| Sexual arousal                |            |         |      |     |         |       |     |         |      |    |         |      |               |         |       |         |                   |      |
| FSFI arousal (0-6)            |            |         |      |     |         |       |     |         |      |    |         |      |               |         |       |         | 13.16(10)         | 0.21 |
| Intervention                  | 112        | 4.75    | 1.40 | 108 | 2.93    | 2.09  | 106 | 3.63    | 1.95 | 98 | 3.90    | 1.89 | 94            | 3.52    | 1.98  |         |                   |      |
| Care-as-usual                 | 117        | 4.81    | 1.35 | 110 | 2.72    | 2.31  | 106 | 3.67    | 1.90 | 98 | 3.75    | 1.91 | 88            | 3.69    | 2.07  |         |                   |      |
| Vaginal lubrication           |            |         |      |     |         |       |     |         |      |    |         |      |               |         |       |         |                   |      |
| FSFI lubrication (0-6)        |            |         |      |     |         |       |     |         |      |    |         |      |               |         |       |         | 4.06(10)          | 0.95 |
| Intervention                  | 112        | 5.14    | 1.49 | 108 | 3.10    | 2.43  | 106 | 3.76    | 2.19 | 98 | 4.15    | 2.11 | 94            | 3.88    | 2.23  |         |                   |      |
| Care-as-usual                 | 117        | 5.24    | 1.52 | 110 | 2.89    | 2.52  | 106 | 3.93    | 2.14 | 98 | 4.17    | 2.13 | 88            | 3.80    | 2.40  |         |                   |      |
| Orgasmic function             |            |         |      |     |         |       |     |         |      |    |         |      |               |         |       |         |                   |      |
| FSFI orgasm (0-6)             |            |         |      |     |         |       |     |         |      |    |         |      |               |         |       |         | 6.52(10)          | 0.77 |
| Intervention                  | 112        | 4.80    | 1.32 | 108 | 3.15    | 2.35  | 106 | 3.88    | 2.10 | 98 | 4.05    | 1.91 | 94            | 3.95    | 1.98  |         |                   |      |
| Care-as-usual                 | 117        | 4.97    | 1.54 | 110 | 2.98    | 2.49  | 106 | 4.03    | 2.11 | 98 | 4.19    | 2.11 | 88            | 3.84    | 2.32  |         |                   |      |
| Sexual satisfaction           |            |         |      |     |         |       |     |         |      |    |         |      |               |         |       |         |                   |      |
| FSFI satisfaction (0-6)       |            |         |      |     |         |       |     |         |      |    |         |      |               |         |       |         | 1.49(10)          | 0.99 |
| Intervention                  | 112        | 4.88    | 1.19 | 108 | 3.77    | 1.54  | 106 | 4.11    | 1.59 | 98 | 4.40    | 1.35 | 94            | 4.18    | 1.53  |         |                   |      |
| Care-as-usual                 | 117        | 4.77    | 1.36 | 110 | 3.62    | 1.58  | 106 | 4.11    | 1.52 | 98 | 4.20    | 1.49 | 87            | 4.06    | 1.54  |         |                   |      |
| Sexual pain                   |            |         |      |     |         |       |     |         |      |    |         |      |               |         |       |         |                   |      |
| FSFI pain (0-6)               |            |         |      |     |         |       |     |         |      |    |         |      |               |         |       |         | 10.75(10)         | 0.37 |
| Intervention                  | 112        | 4.70    | 1.82 | 108 | 2.49    | 2.52  | 106 | 3.54    | 2.28 | 98 | 4.02    | 2.08 | 94            | 4.03    | 2.25  |         |                   |      |
| Care-as-usual                 | 117        | 4.75    | 1.89 | 110 | 2.37    | 2.45  | 106 | 3.54    | 2.28 | 98 | 3.54    | 2.18 | 87            | 3.38    | 2.52  |         |                   |      |

**Supplementary appendix 3** *Continued*

| Outcome measure (range score)  | Assessment |      |      |     |       |       |     |       |       |    |       |       |    |       |       | GLMM outcomes |                   |    |       |       |       |
|--------------------------------|------------|------|------|-----|-------|-------|-----|-------|-------|----|-------|-------|----|-------|-------|---------------|-------------------|----|-------|-------|-------|
|                                | T1         |      |      | T2  |       |       | T3  |       |       | T4 |       |       | T5 |       |       | LRT(df)       | P (overall model) |    |       |       |       |
|                                | N          | M/%  | SD   | N   | M/%   | SD    | N   | M/%   | SD    | N  | M/%   | SD    | N  | M/%   | SD    |               |                   |    |       |       |       |
| <b>Sexual activity</b>         |            |      |      |     |       |       |     |       |       |    |       |       |    |       |       |               |                   |    |       |       |       |
| <b>Intervention</b>            |            |      |      |     |       |       |     |       |       |    |       |       |    |       |       |               |                   |    |       |       |       |
| <i>Never</i>                   | 20         | 18.0 | ..   | 45  | 41.7  | ..    | 36  | 34.0  | ..    | 34 | 34.7  | ..    | 27 | 28.7  | ..    | 0.54(5)       | 0.99              |    |       |       |       |
| <i>Several times per month</i> | 33         | 29.7 | ..   | 26  | 24.1  | ..    | 32  | 30.2  | ..    | 29 | 29.6  | ..    | 36 | 38.3  | ..    |               |                   |    |       |       |       |
| <i>1 time/week</i>             | 20         | 18.0 | ..   | 17  | 15.7  | ..    | 17  | 16.0  | ..    | 16 | 16.3  | ..    | 15 | 16.0  | ..    |               |                   |    |       |       |       |
| <i>≥2 times/week</i>           | 38         | 34.2 | ..   | 20  | 18.5  | ..    | 21  | 19.8  | ..    | 19 | 19.4  | ..    | 16 | 17.0  | ..    |               |                   |    |       |       |       |
| <b>Care-as-usual</b>           |            |      |      |     |       |       |     |       |       |    |       |       |    |       |       |               |                   |    |       |       |       |
| <i>Never</i>                   | 22         | 19.0 | ..   | 45  | 40.9  | ..    | 37  | 34.9  | ..    | 34 | 34.7  | ..    | 27 | 31.0  | ..    | 3.36(3)       | 0.34              |    |       |       |       |
| <i>Several times per month</i> | 37         | 31.9 | ..   | 28  | 25.5  | ..    | 34  | 32.1  | ..    | 37 | 37.8  | ..    | 37 | 42.5  | ..    |               |                   |    |       |       |       |
| <i>1 time/week</i>             | 28         | 24.1 | ..   | 11  | 10.0  | ..    | 16  | 15.1  | ..    | 11 | 11.2  | ..    | 11 | 12.6  | ..    |               |                   |    |       |       |       |
| <i>≥2 times/week</i>           | 29         | 25.0 | ..   | 26  | 23.6  | ..    | 19  | 17.9  | ..    | 16 | 16.3  | ..    | 12 | 13.8  | ..    |               |                   |    |       |       |       |
| <b>Sexual Intercourse</b>      |            |      |      |     |       |       |     |       |       |    |       |       |    |       |       |               |                   |    |       |       |       |
| <b>Intervention</b>            |            |      |      |     |       |       |     |       |       |    |       |       |    |       |       |               |                   |    |       |       |       |
| <i>Never</i>                   | 15         | 13.6 | ..   | 62  | 57.9  | ..    | 37  | 34.9  | ..    | 25 | 25.5  | ..    | 29 | 30.9  | ..    | 7.57(10)      | 0.67              |    |       |       |       |
| <i>Several times per month</i> | 33         | 30.0 | ..   | 19  | 17.8  | ..    | 24  | 22.6  | ..    | 28 | 28.6  | ..    | 22 | 23.4  | ..    |               |                   |    |       |       |       |
| <i>1 time/week</i>             | 18         | 16.4 | ..   | 14  | 13.1  | ..    | 22  | 20.8  | ..    | 20 | 20.4  | ..    | 26 | 27.7  | ..    |               |                   |    |       |       |       |
| <i>≥2 times/week</i>           | 44         | 40.0 | ..   | 12  | 11.2  | ..    | 23  | 21.7  | ..    | 25 | 25.5  | ..    | 17 | 18.1  | ..    |               |                   |    |       |       |       |
| <b>Care-as-usual</b>           |            |      |      |     |       |       |     |       |       |    |       |       |    |       |       |               |                   |    |       |       |       |
| <i>Never</i>                   | 20         | 17.1 | ..   | 71  | 64.5  | ..    | 37  | 34.9  | ..    | 37 | 37.8  | ..    | 31 | 35.6  | ..    | 94            | 14.65             |    |       |       |       |
| <i>Several times per month</i> | 37         | 31.6 | ..   | 13  | 11.8  | ..    | 32  | 30.2  | ..    | 26 | 26.5  | ..    | 25 | 28.7  | ..    |               |                   | 87 | 13.94 |       |       |
| <i>1 time/week</i>             | 25         | 21.4 | ..   | 7   | 6.4   | ..    | 17  | 16.0  | ..    | 13 | 13.3  | ..    | 13 | 14.9  | ..    |               |                   |    |       | 12.07 | 10.97 |
| <i>≥2 times/week</i>           | 35         | 29.9 | ..   | 19  | 17.3  | ..    | 20  | 18.9  | ..    | 22 | 22.4  | ..    | 18 | 20.7  | ..    |               |                   |    |       |       |       |
| <b>Secondary</b>               |            |      |      |     |       |       |     |       |       |    |       |       |    |       |       |               |                   |    |       |       |       |
| <b>Sexual Distress</b>         |            |      |      |     |       |       |     |       |       |    |       |       |    |       |       |               |                   |    |       |       |       |
| <b>FSDS (0-48)</b>             |            |      |      |     |       |       |     |       |       |    |       |       |    |       |       |               |                   |    |       |       |       |
| <i>Intervention</i>            | 112        | 9.32 | 9.40 | 107 | 14.37 | 10.49 | 106 | 13.69 | 10.55 | 98 | 14.17 | 10.31 | 94 | 14.65 | 12.07 | 7.57(10)      | 0.67              |    |       |       |       |
| <i>Care-as-usual</i>           | 117        | 8.74 | 9.36 | 110 | 12.95 | 10.01 | 106 | 13.17 | 9.92  | 98 | 14.35 | 11.36 | 87 | 13.94 | 10.97 |               |                   |    |       |       |       |

**Supplementary appendix 3** *Continued*

| Outcome measure (range score)  | Assessment |     |    |    |      |    |    |      |    |    |      |    |    |      |    | GLMM outcomes |                   |
|--------------------------------|------------|-----|----|----|------|----|----|------|----|----|------|----|----|------|----|---------------|-------------------|
|                                | T1         |     |    | T2 |      |    | T3 |      |    | T4 |      |    | T5 |      |    | LRT(df)       | P (overall model) |
|                                | N          | M/% | SD | N  | M/%  | SD | N  | M/%  | SD | N  | M/%  | SD | N  | M/%  | SD |               |                   |
| Vaginal dilation               |            |     |    |    |      |    |    |      |    |    |      |    |    |      |    |               |                   |
| Dilator use                    |            |     |    |    |      |    |    |      |    |    |      |    |    |      |    | 5.25(4)       | 0.24              |
| Intervention                   |            |     |    |    |      |    |    |      |    |    |      |    |    |      |    |               |                   |
| <i>Never</i>                   | ..         | ..  | .. | 43 | 45.3 | .. | 8  | 8.6  | .. | 14 | 16.3 | .. | 22 | 26.8 | .. |               |                   |
| <i>Several times per month</i> | ..         | ..  | .. | 3  | 3.2  | .. | 6  | 6.5  | .. | 8  | 9.3  | .. | 19 | 23.2 | .. |               |                   |
| <i>1 time/week</i>             | ..         | ..  | .. | 5  | 5.3  | .. | 12 | 12.9 | .. | 20 | 23.3 | .. | 15 | 18.3 | .. |               |                   |
| <i>2 times/week</i>            | ..         | ..  | .. | 10 | 10.5 | .. | 27 | 29.0 | .. | 16 | 18.6 | .. | 17 | 20.7 | .. |               |                   |
| <i>3 times/week</i>            | ..         | ..  | .. | 29 | 30.5 | .. | 38 | 40.9 | .. | 25 | 29.1 | .. | 9  | 11.0 | .. |               |                   |
| <i>4-6 times/week</i>          | ..         | ..  | .. | 5  | 5.3  | .. | 2  | 2.2  | .. | 3  | 3.5  | .. | 0  | 0    | .. |               |                   |
| <i>Daily</i>                   | ..         | ..  | .. | 0  | 0    | .. | 0  | 0    | .. | 0  | 0    | .. | 0  | 0    | .. |               |                   |
| Care-as-usual                  |            |     |    |    |      |    |    |      |    |    |      |    |    |      |    |               |                   |
| <i>Never</i>                   | ..         | ..  | .. | 40 | 43.0 | .. | 17 | 18.7 | .. | 23 | 27.1 | .. | 29 | 38.2 | .. |               |                   |
| <i>Several times per month</i> | ..         | ..  | .. | 4  | 4.3  | .. | 12 | 13.2 | .. | 13 | 15.3 | .. | 23 | 30.3 | .. |               |                   |
| <i>1 time/week</i>             | ..         | ..  | .. | 5  | 5.4  | .. | 9  | 9.9  | .. | 19 | 22.4 | .. | 6  | 7.9  | .. |               |                   |
| <i>2 times/week</i>            | ..         | ..  | .. | 16 | 17.2 | .. | 21 | 23.1 | .. | 15 | 17.6 | .. | 10 | 13.2 | .. |               |                   |
| <i>3 times/week</i>            | ..         | ..  | .. | 25 | 26.9 | .. | 29 | 31.9 | .. | 13 | 15.3 | .. | 6  | 7.9  | .. |               |                   |
| <i>4-6 times/week</i>          | ..         | ..  | .. | 1  | 1.1  | .. | 3  | 3.3  | .. | 1  | 1.2  | .. | 2  | 2.6  | .. |               |                   |
| <i>Daily</i>                   | ..         | ..  | .. | 2  | 2.2  | .. | 0  | 0    | .. | 1  | 1.2  | .. | 0  | 0    | .. |               |                   |
| Vaginal dilation               |            |     |    |    |      |    |    |      |    |    |      |    |    |      |    |               |                   |
| Vibrator/dildo /fingers        |            |     |    |    |      |    |    |      |    |    |      |    |    |      |    | 1.90(4)       | 0.75              |
| Intervention                   |            |     |    |    |      |    |    |      |    |    |      |    |    |      |    |               |                   |
| <i>Never</i>                   | ..         | ..  | .. | 67 | 70.5 | .. | 48 | 51.6 | .. | 46 | 53.5 | .. | 38 | 46.3 | .. |               |                   |
| <i>Several times per month</i> | ..         | ..  | .. | 12 | 12.6 | .. | 25 | 26.9 | .. | 21 | 24.4 | .. | 28 | 34.1 | .. |               |                   |
| <i>1 time/week</i>             | ..         | ..  | .. | 7  | 7.4  | .. | 12 | 12.9 | .. | 11 | 12.8 | .. | 10 | 12.2 | .. |               |                   |
| <i>2 times/week</i>            | ..         | ..  | .. | 4  | 4.2  | .. | 6  | 6.5  | .. | 6  | 7.0  | .. | 2  | 2.4  | .. |               |                   |
| <i>3 times/week</i>            | ..         | ..  | .. | 4  | 4.2  | .. | 2  | 2.2  | .. | 2  | 2.3  | .. | 4  | 4.9  | .. |               |                   |
| <i>4-6 times/week</i>          | ..         | ..  | .. | 1  | 1.1  | .. | 0  | 0    | .. | 0  | 0    | .. | 0  | 0    | .. |               |                   |
| <i>Daily</i>                   | ..         | ..  | .. | 0  | 0    | .. | 0  | 0    | .. | 0  | 0    | .. | 0  | 0    | .. |               |                   |
| Care-as-usual                  |            |     |    |    |      |    |    |      |    |    |      |    |    |      |    |               |                   |
| <i>Never</i>                   | ..         | ..  | .. | 68 | 73.1 | .. | 58 | 63.7 | .. | 49 | 57.6 | .. | 46 | 60.5 | .. |               |                   |
| <i>Several times per month</i> | ..         | ..  | .. | 12 | 12.9 | .. | 21 | 23.1 | .. | 23 | 27.1 | .. | 19 | 25.0 | .. |               |                   |
| <i>1 time/week</i>             | ..         | ..  | .. | 2  | 2.2  | .. | 6  | 6.6  | .. | 5  | 5.9  | .. | 5  | 6.6  | .. |               |                   |
| <i>2 times/week</i>            | ..         | ..  | .. | 7  | 7.5  | .. | 2  | 2.2  | .. | 2  | 2.4  | .. | 5  | 6.6  | .. |               |                   |
| <i>3 times/week</i>            | ..         | ..  | .. | 2  | 2.2  | .. | 2  | 2.2  | .. | 3  | 3.5  | .. | 1  | 1.3  | .. |               |                   |
| <i>4-6 times/week</i>          | ..         | ..  | .. | 1  | 1.1  | .. | 1  | 1.1  | .. | 2  | 2.4  | .. | 0  | 0    | .. |               |                   |
| <i>Daily</i>                   | ..         | ..  | .. | 1  | 1.1  | .. | 1  | 1.1  | .. | 1  | 1.2  | .. | 0  | 0    | .. |               |                   |

**Supplementary appendix 3** *Continued*

| Outcome measure (range score)              | Assessment |     |    |     |       |       |     |       |       |    |       |       |    |       |       | GLMM outcomes |                   |
|--------------------------------------------|------------|-----|----|-----|-------|-------|-----|-------|-------|----|-------|-------|----|-------|-------|---------------|-------------------|
|                                            | T1         |     |    | T2  |       |       | T3  |       |       | T4 |       |       | T5 |       |       | LRT(df)       | P (overall model) |
|                                            | N          | M/% | SD | N   | M/%   | SD    | N   | M/%   | SD    | N  | M/%   | SD    | N  | M/%   | SD    |               |                   |
| Vaginal dilation - Intercourse             |            |     |    |     |       |       |     |       |       |    |       |       |    |       |       |               |                   |
| Intervention                               | ..         | ..  | .. | 60  | 63.2  | ..    | 35  | 37.6  | ..    | 22 | 25.6  | ..    | 25 | 30.5  | ..    | 2.33(4)       | 0.68              |
| <i>Never</i>                               | ..         | ..  | .. | 10  | 10.5  | ..    | 18  | 19.4  | ..    | 24 | 27.9  | ..    | 18 | 22.0  | ..    |               |                   |
| <i>Several times per month</i>             | ..         | ..  | .. | 14  | 14.7  | ..    | 21  | 22.6  | ..    | 16 | 18.6  | ..    | 23 | 28.0  | ..    |               |                   |
| <i>1 time/week</i>                         | ..         | ..  | .. | 9   | 9.5   | ..    | 13  | 14.0  | ..    | 16 | 18.6  | ..    | 11 | 13.4  | ..    |               |                   |
| <i>2 times/week</i>                        | ..         | ..  | .. | 2   | 2.1   | ..    | 5   | 5.4   | ..    | 6  | 7.0   | ..    | 3  | 3.7   | ..    |               |                   |
| <i>3 times/week</i>                        | ..         | ..  | .. | 0   | 0     | ..    | 0   | 0     | ..    | 1  | 1.2   | ..    | 2  | 2.4   | ..    |               |                   |
| <i>4-6 times/week</i>                      | ..         | ..  | .. | 0   | 0     | ..    | 1   | 1.1   | ..    | 1  | 1.2   | ..    | 0  | 0     | ..    |               |                   |
| <i>Daily</i>                               | ..         | ..  | .. | 62  | 66.7  | ..    | 34  | 37.4  | ..    | 32 | 37.6  | ..    | 26 | 34.2  | ..    |               |                   |
| Care-as-usual                              | ..         | ..  | .. | 12  | 12.9  | ..    | 27  | 29.7  | ..    | 28 | 32.9  | ..    | 23 | 30.3  | ..    |               |                   |
| <i>Never</i>                               | ..         | ..  | .. | 5   | 5.4   | ..    | 12  | 13.2  | ..    | 9  | 10.6  | ..    | 12 | 15.8  | ..    |               |                   |
| <i>Several times per month</i>             | ..         | ..  | .. | 6   | 6.5   | ..    | 9   | 9.9   | ..    | 10 | 11.8  | ..    | 8  | 10.5  | ..    |               |                   |
| <i>1 time/week</i>                         | ..         | ..  | .. | 5   | 5.4   | ..    | 6   | 6.6   | ..    | 4  | 4.7   | ..    | 3  | 3.9   | ..    |               |                   |
| <i>2 times/week</i>                        | ..         | ..  | .. | 2   | 2.2   | ..    | 2   | 2.2   | ..    | 1  | 1.2   | ..    | 3  | 3.9   | ..    |               |                   |
| <i>3 times/week</i>                        | ..         | ..  | .. | 1   | 1.1   | ..    | 1   | 1.1   | ..    | 1  | 1.2   | ..    | 1  | 1.3   | ..    |               |                   |
| <i>4-6 times/week</i>                      | ..         | ..  | .. | 1   | 1.1   | ..    | 1   | 1.1   | ..    | 1  | 1.2   | ..    | 1  | 1.3   | ..    |               |                   |
| <i>Daily</i>                               | ..         | ..  | .. | 1   | 1.1   | ..    | 1   | 1.1   | ..    | 1  | 1.2   | ..    | 1  | 1.3   | ..    |               |                   |
| Any type of vaginal dilation ≥2 times/week |            |     |    |     |       |       |     |       |       |    |       |       |    |       |       |               |                   |
| Intervention                               | ..         | ..  | .. | 66  | 69.5  | ..    | 90  | 96.8  | ..    | 81 | 94.2  | ..    | 70 | 85.4  | ..    | 1.39(4)       | 0.85              |
| <i>Yes</i>                                 | ..         | ..  | .. | 29  | 30.5  | ..    | 3   | 3.2   | ..    | 5  | 5.8   | ..    | 12 | 14.6  | ..    |               |                   |
| <i>No</i>                                  | ..         | ..  | .. | 60  | 64.5  | ..    | 82  | 90.1  | ..    | 69 | 81.2  | ..    | 57 | 75.0  | ..    |               |                   |
| Care-as-usual                              | ..         | ..  | .. | 33  | 35.5  | ..    | 9   | 9.9   | ..    | 16 | 18.8  | ..    | 19 | 25.0  | ..    |               |                   |
| <i>Yes</i>                                 | ..         | ..  | .. | 60  | 64.5  | ..    | 82  | 90.1  | ..    | 69 | 81.2  | ..    | 57 | 75.0  | ..    |               |                   |
| <i>No</i>                                  | ..         | ..  | .. | 33  | 35.5  | ..    | 9   | 9.9   | ..    | 16 | 18.8  | ..    | 19 | 25.0  | ..    |               |                   |
| Sexual functioning                         |            |     |    |     |       |       |     |       |       |    |       |       |    |       |       |               |                   |
| EORTC QLQ-CX24 (0-100)                     |            |     |    |     |       |       |     |       |       |    |       |       |    |       |       |               |                   |
| Intervention                               | ..         | ..  | .. | 52  | 26.44 | 19.65 | 76  | 22.59 | 20.18 | 77 | 21.43 | 18.75 | 70 | 18.69 | 19.32 | 10.64(8)      | 0.22              |
| Care-as-usual                              | ..         | ..  | .. | 50  | 23.67 | 18.62 | 70  | 22.74 | 17.60 | 66 | 22.60 | 16.06 | 62 | 19.49 | 21.65 |               |                   |
| Vaginal symptoms                           |            |     |    |     |       |       |     |       |       |    |       |       |    |       |       |               |                   |
| EORTC QLQ-CX24 (0-100)                     |            |     |    |     |       |       |     |       |       |    |       |       |    |       |       |               |                   |
| Intervention                               | ..         | ..  | .. | 107 | 16.30 | 14.90 | 106 | 11.43 | 11.83 | 98 | 11.0  | 12.71 | 94 | 10.99 | 13.19 | 3.92(8)       | 0.86              |
| Care-as-usual                              | ..         | ..  | .. | 109 | 16.00 | 14.46 | 106 | 12.06 | 13.38 | 97 | 10.20 | 12.39 | 87 | 10.47 | 13.38 |               |                   |

**Supplementary appendix 3** *Continued*

| Outcome measure (range score)                                     | Assessment |     |    |    |      |    |    |      |    |    |      |    |    |      |    | GLMM outcomes |                   |      |
|-------------------------------------------------------------------|------------|-----|----|----|------|----|----|------|----|----|------|----|----|------|----|---------------|-------------------|------|
|                                                                   | T1         |     |    | T2 |      |    | T3 |      |    | T4 |      |    | T5 |      |    | LRT(df)       | P (overall model) |      |
|                                                                   | N          | M/% | SD | N  | M/%  | SD | N  | M/%  | SD | N  | M/%  | SD | N  | M/%  | SD |               |                   |      |
| Sexual/vaginal functioning<br>EORTC QLQ-CX24<br>Vaginal dryness   |            |     |    |    |      |    |    |      |    |    |      |    |    |      |    |               |                   |      |
| Intervention                                                      |            |     |    |    |      |    |    |      |    |    |      |    |    |      |    |               | 0.83(8)           | 0.99 |
| <i>Not at all</i>                                                 | ..         | ..  | .. | 20 | 38.5 | .. | 35 | 46.1 | .. | 35 | 45.5 | .. | 36 | 51.4 | .. |               |                   |      |
| <i>A little</i>                                                   | ..         | ..  | .. | 25 | 48.1 | .. | 22 | 28.9 | .. | 27 | 35.1 | .. | 19 | 27.1 | .. |               |                   |      |
| <i>Quite a bit</i>                                                | ..         | ..  | .. | 5  | 9.6  | .. | 11 | 14.5 | .. | 12 | 15.6 | .. | 11 | 15.7 | .. |               |                   |      |
| <i>Very much</i>                                                  | ..         | ..  | .. | 2  | 3.8  | .. | 8  | 10.5 | .. | 3  | 3.9  | .. | 4  | 5.7  | .. |               |                   |      |
| Care-as-usual                                                     |            |     |    |    |      |    |    |      |    |    |      |    |    |      |    |               |                   |      |
| <i>Not at all</i>                                                 | ..         | ..  | .. | 25 | 50.0 | .. | 30 | 42.9 | .. | 26 | 39.4 | .. | 31 | 50.0 | .. |               |                   |      |
| <i>A little</i>                                                   | ..         | ..  | .. | 14 | 28.0 | .. | 33 | 47.1 | .. | 31 | 47.0 | .. | 23 | 37.1 | .. |               |                   |      |
| <i>Quite a bit</i>                                                | ..         | ..  | .. | 9  | 18.0 | .. | 3  | 4.3  | .. | 7  | 10.6 | .. | 4  | 6.5  | .. |               |                   |      |
| <i>Very much</i>                                                  | ..         | ..  | .. | 2  | 4.0  | .. | 4  | 5.7  | .. | 2  | 3.0  | .. | 4  | 6.5  | .. |               |                   |      |
| Sexual/vaginal functioning<br>EORTC QLQ-CX24<br>vaginal shortness |            |     |    |    |      |    |    |      |    |    |      |    |    |      |    |               |                   |      |
| Intervention                                                      |            |     |    |    |      |    |    |      |    |    |      |    |    |      |    |               | 1.18(8)           | 0.99 |
| <i>Not at all</i>                                                 | ..         | ..  | .. | 24 | 46.2 | .. | 41 | 53.9 | .. | 42 | 54.5 | .. | 40 | 57.1 | .. |               |                   |      |
| <i>A little</i>                                                   | ..         | ..  | .. | 21 | 40.4 | .. | 22 | 28.9 | .. | 20 | 26.0 | .. | 21 | 30.0 | .. |               |                   |      |
| <i>Quite a bit</i>                                                | ..         | ..  | .. | 3  | 5.8  | .. | 10 | 13.2 | .. | 11 | 14.3 | .. | 7  | 10.0 | .. |               |                   |      |
| <i>Very much</i>                                                  | ..         | ..  | .. | 4  | 7.7  | .. | 3  | 3.9  | .. | 4  | 5.2  | .. | 2  | 2.9  | .. |               |                   |      |
| Care-as-usual                                                     |            |     |    |    |      |    |    |      |    |    |      |    |    |      |    |               |                   |      |
| <i>Not at all</i>                                                 | ..         | ..  | .. | 23 | 46.0 | .. | 35 | 50.0 | .. | 29 | 43.9 | .. | 34 | 54.8 | .. |               |                   |      |
| <i>A little</i>                                                   | ..         | ..  | .. | 21 | 42.0 | .. | 27 | 38.6 | .. | 28 | 42.4 | .. | 20 | 32.3 | .. |               |                   |      |
| <i>Quite a bit</i>                                                | ..         | ..  | .. | 4  | 8.0  | .. | 8  | 11.4 | .. | 8  | 12.1 | .. | 4  | 6.5  | .. |               |                   |      |
| <i>Very much</i>                                                  | ..         | ..  | .. | 2  | 4.0  | .. | 0  | 0    | .. | 1  | 1.5  | .. | 4  | 6.5  | .. |               |                   |      |
| Sexual/vaginal functioning<br>EORTC QLQ-CX24<br>vaginal tightness |            |     |    |    |      |    |    |      |    |    |      |    |    |      |    |               |                   |      |
| Intervention                                                      |            |     |    |    |      |    |    |      |    |    |      |    |    |      |    |               | 3.23(8)           | 0.92 |
| <i>Not at all</i>                                                 | ..         | ..  | .. | 22 | 42.3 | .. | 47 | 61.8 | .. | 54 | 70.1 | .. | 51 | 72.9 | .. |               |                   |      |
| <i>A little</i>                                                   | ..         | ..  | .. | 19 | 36.5 | .. | 24 | 31.6 | .. | 14 | 18.2 | .. | 14 | 20.0 | .. |               |                   |      |
| <i>Quite a bit</i>                                                | ..         | ..  | .. | 7  | 13.5 | .. | 5  | 6.6  | .. | 8  | 10.4 | .. | 5  | 7.1  | .. |               |                   |      |
| <i>Very much</i>                                                  | ..         | ..  | .. | 4  | 7.7  | .. | 0  | 0    | .. | 1  | 1.3  | .. | 0  | 0    | .. |               |                   |      |
| Care-as-usual                                                     |            |     |    |    |      |    |    |      |    |    |      |    |    |      |    |               |                   |      |
| <i>Not at all</i>                                                 | ..         | ..  | .. | 25 | 50.0 | .. | 33 | 47.1 | .. | 38 | 57.6 | .. | 39 | 62.9 | .. |               |                   |      |
| <i>A little</i>                                                   | ..         | ..  | .. | 22 | 44.0 | .. | 28 | 40.0 | .. | 20 | 30.3 | .. | 16 | 25.8 | .. |               |                   |      |
| <i>Quite a bit</i>                                                | ..         | ..  | .. | 1  | 2.0  | .. | 7  | 10.0 | .. | 8  | 12.1 | .. | 4  | 6.5  | .. |               |                   |      |
| <i>Very much</i>                                                  | ..         | ..  | .. | 2  | 4.0  | .. | 2  | 2.9  | .. | 0  | 0    | .. | 3  | 4.8  | .. |               |                   |      |

**Supplementary appendix 3** *Continued*

| Outcome measure (range score) | Assessment |     |    |     |       |       |     |       |       |    |       |       |    |       |       | GLMM outcomes |                   |
|-------------------------------|------------|-----|----|-----|-------|-------|-----|-------|-------|----|-------|-------|----|-------|-------|---------------|-------------------|
|                               | T1         |     |    | T2  |       |       | T3  |       |       | T4 |       |       | T5 |       |       | LRT(df)       | P (overall model) |
|                               | N          | M/% | SD | N   | M/%   | SD    | N   | M/%   | SD    | N  | M/%   | SD    | N  | M/%   | SD    |               |                   |
| Sexual/vaginal functioning    |            |     |    |     |       |       |     |       |       |    |       |       |    |       |       |               |                   |
| EORTC QLQ-CX24                |            |     |    |     |       |       |     |       |       |    |       |       |    |       |       |               |                   |
| Pain during intercourse       |            |     |    |     |       |       |     |       |       |    |       |       |    |       |       |               |                   |
| Intervention                  |            |     |    |     |       |       |     |       |       |    |       |       |    |       |       | 1-24(8)       | 0-99              |
| Not at all                    | ..         | ..  | .. | 18  | 34.6  | ..    | 31  | 40.8  | ..    | 34 | 44.2  | ..    | 37 | 52.9  | ..    |               |                   |
| A little                      | ..         | ..  | .. | 29  | 55.8  | ..    | 38  | 50.0  | ..    | 35 | 45.5  | ..    | 27 | 38.6  | ..    |               |                   |
| Quite a bit                   | ..         | ..  | .. | 4   | 7.7   | ..    | 6   | 7.9   | ..    | 8  | 10.4  | ..    | 6  | 8.6   | ..    |               |                   |
| Very much                     | ..         | ..  | .. | 1   | 1.9   | ..    | 1   | 1.3   | ..    | 0  | 0     | ..    | 0  | 0     | ..    |               |                   |
| Care-as-usual                 |            |     |    |     |       |       |     |       |       |    |       |       |    |       |       |               |                   |
| Not at all                    | ..         | ..  | .. | 18  | 36.0  | ..    | 27  | 38.6  | ..    | 26 | 39.4  | ..    | 37 | 59.7  | ..    |               |                   |
| A little                      | ..         | ..  | .. | 28  | 56.0  | ..    | 38  | 54.3  | ..    | 35 | 53.0  | ..    | 21 | 33.9  | ..    |               |                   |
| Quite a bit                   | ..         | ..  | .. | 1   | 2.0   | ..    | 4   | 5.7   | ..    | 5  | 7.6   | ..    | 4  | 6.5   | ..    |               |                   |
| Very much                     | ..         | ..  | .. | 3   | 6.0   | ..    | 1   | 1.4   | ..    | 0  | 0     | ..    | 0  | 0     | ..    |               |                   |
| Sexual worry                  |            |     |    |     |       |       |     |       |       |    |       |       |    |       |       |               |                   |
| EORTC QLQ-CX24 (0-100)        |            |     |    |     |       |       |     |       |       |    |       |       |    |       |       | 2-99(8)       | 0-94              |
| Intervention                  | ..         | ..  | .. | 107 | 39.25 | 32.96 | 105 | 26.98 | 28.53 | 98 | 21.43 | 27.60 | 94 | 22.34 | 29.89 |               |                   |
| Care-as-usual                 | ..         | ..  | .. | 109 | 37.00 | 32.18 | 106 | 25.47 | 25.43 | 98 | 24.15 | 30.57 | 87 | 19.92 | 28.96 |               |                   |
| Sexual activity               |            |     |    |     |       |       |     |       |       |    |       |       |    |       |       |               |                   |
| EORTC QLQ-CX24 (0-100)        |            |     |    |     |       |       |     |       |       |    |       |       |    |       |       | 8-89(8)       | 0-35              |
| Intervention                  | ..         | ..  | .. | 107 | 21.18 | 24.40 | 105 | 33.97 | 27.34 | 98 | 39.80 | 26.93 | 94 | 36.17 | 26.62 |               |                   |
| Care-as-usual                 | ..         | ..  | .. | 109 | 22.94 | 29.29 | 106 | 30.82 | 27.87 | 98 | 30.95 | 27.18 | 87 | 34.87 | 28.26 |               |                   |
| Sexual enjoyment              |            |     |    |     |       |       |     |       |       |    |       |       |    |       |       |               |                   |
| EORTC QLQ-CX24 (0-100)        |            |     |    |     |       |       |     |       |       |    |       |       |    |       |       | 11-58(8)      | 0-17              |
| Intervention                  | ..         | ..  | .. | 52  | 58.97 | 26.09 | 76  | 59.65 | 29.47 | 77 | 62.77 | 24.76 | 70 | 62.38 | 28.33 |               |                   |
| Care-as-usual                 | ..         | ..  | .. | 50  | 60.67 | 29.11 | 70  | 62.38 | 27.76 | 66 | 60.10 | 23.55 | 62 | 63.98 | 27.86 |               |                   |
| Sexual interest               |            |     |    |     |       |       |     |       |       |    |       |       |    |       |       |               |                   |
| EORTC QLQ-EN24 (0-100)        |            |     |    |     |       |       |     |       |       |    |       |       |    |       |       | 4-2(8)        | 0-84              |
| Intervention                  | ..         | ..  | .. | 107 | 30.84 | 27.36 | 105 | 34.92 | 27.50 | 98 | 38.78 | 27.78 | 94 | 34.04 | 29.32 |               |                   |
| Care-as-usual                 | ..         | ..  | .. | 109 | 30.28 | 25.88 | 106 | 34.91 | 27.36 | 98 | 35.71 | 24.99 | 87 | 34.48 | 28.05 |               |                   |
| Symptom experience            |            |     |    |     |       |       |     |       |       |    |       |       |    |       |       |               |                   |
| EORTC QLQ-CX24 (0-100)        |            |     |    |     |       |       |     |       |       |    |       |       |    |       |       | 3-01(8)       | 0-93              |
| Intervention                  | ..         | ..  | .. | 107 | 15.89 | 10.55 | 105 | 13.45 | 8.82  | 98 | 14.13 | 9.63  | 94 | 13.38 | 10.10 |               |                   |
| Care-as-usual                 | ..         | ..  | .. | 109 | 16.51 | 10.75 | 106 | 14.47 | 11.12 | 97 | 13.93 | 10.04 | 87 | 13.27 | 9.97  |               |                   |
| Body image                    |            |     |    |     |       |       |     |       |       |    |       |       |    |       |       |               |                   |
| EORTC QLQ-CX24 (0-100)        |            |     |    |     |       |       |     |       |       |    |       |       |    |       |       | 4-17(8)       | 0-84              |
| Intervention                  | ..         | ..  | .. | 107 | 31.67 | 27.59 | 105 | 27.41 | 27.99 | 98 | 27.55 | 27.60 | 94 | 29.55 | 28.25 |               |                   |
| Care-as-usual                 | ..         | ..  | .. | 109 | 29.46 | 26.47 | 104 | 28.95 | 26.02 | 98 | 27.89 | 25.04 | 87 | 26.44 | 24.80 |               |                   |



**Supplementary appendix 3** *Continued*

| Outcome measure (range score)                  | Assessment |     |    |     |       |       |     |       |       |    |       |       |    |       |       | GLMM outcomes |                   |
|------------------------------------------------|------------|-----|----|-----|-------|-------|-----|-------|-------|----|-------|-------|----|-------|-------|---------------|-------------------|
|                                                | T1         |     |    | T2  |       |       | T3  |       |       | T4 |       |       | T5 |       |       | LRT(df)       | P (overall model) |
|                                                | N          | M/% | SD | N   | M/%   | SD    | N   | M/%   | SD    | N  | M/%   | SD    | N  | M/%   | SD    |               |                   |
| Lymphedema                                     |            |     |    |     |       |       |     |       |       |    |       |       |    |       |       |               |                   |
| EORTC QLQ-CX24 (0-100)                         |            |     |    |     |       |       |     |       |       |    |       |       |    |       |       | 6.16(8)       | 0.63              |
| Intervention                                   | ..         | ..  | .. | 107 | 11.22 | 21.45 | 106 | 11.32 | 21.52 | 98 | 14.97 | 26.70 | 94 | 13.83 | 23.14 |               |                   |
| Care-as-usual                                  | ..         | ..  | .. | 109 | 8.26  | 19.85 | 106 | 11.01 | 23.33 | 98 | 10.88 | 21.29 | 87 | 15.33 | 27.28 |               |                   |
| Peripheral neuropathy                          |            |     |    |     |       |       |     |       |       |    |       |       |    |       |       |               |                   |
| EORTC QLQ-CX24 (0-100)                         |            |     |    |     |       |       |     |       |       |    |       |       |    |       |       | 2.68(6)       | 0.85              |
| Intervention                                   | ..         | ..  | .. | 107 | 11.84 | 20.09 | 106 | 16.67 | 26.53 | 98 | 15.99 | 24.51 | 94 | 17.02 | 25.28 |               |                   |
| Care-as-usual                                  | ..         | ..  | .. | 109 | 10.70 | 19.71 | 106 | 14.78 | 26.46 | 98 | 14.63 | 25.80 | 87 | 15.33 | 24.80 |               |                   |
| Menopausal symptoms                            |            |     |    |     |       |       |     |       |       |    |       |       |    |       |       |               |                   |
| EORTC QLQ-CX24 (0-100)                         |            |     |    |     |       |       |     |       |       |    |       |       |    |       |       | 4.27(8)       | 0.83              |
| Intervention                                   | ..         | ..  | .. | 107 | 36.76 | 32.68 | 106 | 37.11 | 32.31 | 98 | 32.65 | 33.15 | 94 | 30.85 | 30.23 |               |                   |
| Care-as-usual                                  | ..         | ..  | .. | 109 | 31.19 | 31.84 | 106 | 30.82 | 33.40 | 98 | 28.91 | 30.13 | 87 | 23.37 | 28.36 |               |                   |
| Urological symptoms                            |            |     |    |     |       |       |     |       |       |    |       |       |    |       |       |               |                   |
| EORTC QLQ-CX24 (0-100)                         |            |     |    |     |       |       |     |       |       |    |       |       |    |       |       | 3.32(8)       | 0.91              |
| Intervention                                   | ..         | ..  | .. | 107 | 18.77 | 18.28 | 105 | 13.41 | 14.36 | 98 | 15.14 | 15.48 | 94 | 13.21 | 12.78 |               |                   |
| Care-as-usual                                  | ..         | ..  | .. | 109 | 17.74 | 15.92 | 106 | 15.17 | 16.34 | 98 | 15.05 | 14.88 | 87 | 14.56 | 14.45 |               |                   |
| Gastrointestinal symptoms                      |            |     |    |     |       |       |     |       |       |    |       |       |    |       |       |               |                   |
| EORTC QLQ-CX24 (0-100)                         |            |     |    |     |       |       |     |       |       |    |       |       |    |       |       | 9.28(8)       | 0.32              |
| Intervention                                   | ..         | ..  | .. | 107 | 10.67 | 10.60 | 106 | 12.81 | 13.67 | 98 | 12.50 | 13.18 | 94 | 12.59 | 13.54 |               |                   |
| Care-as-usual                                  | ..         | ..  | .. | 109 | 13.91 | 14.35 | 106 | 13.13 | 14.36 | 98 | 14.20 | 14.86 | 87 | 11.59 | 12.48 |               |                   |
| Fear of sexuality - FSQ                        |            |     |    |     |       |       |     |       |       |    |       |       |    |       |       |               |                   |
| fear of non-penetration sexual activity (0-20) |            |     |    |     |       |       |     |       |       |    |       |       |    |       |       | 7.19(8)       | 0.51              |
| Intervention                                   | ..         | ..  | .. | 107 | 4.33  | 4.10  | 106 | 3.56  | 3.94  | 98 | 3.58  | 4.39  | 94 | 4.11  | 4.73  |               |                   |
| Care-as-usual                                  | ..         | ..  | .. | 109 | 3.83  | 4.10  | 106 | 3.40  | 3.83  | 98 | 3.30  | 3.80  | 87 | 3.32  | 4.30  |               |                   |
| Fear of sexuality - FSQ                        |            |     |    |     |       |       |     |       |       |    |       |       |    |       |       |               |                   |
| fear of coitus/vaginal penetration (0-12)      |            |     |    |     |       |       |     |       |       |    |       |       |    |       |       | 2.41(8)       | 0.97              |
| Intervention                                   | ..         | ..  | .. | 107 | 1.65  | 2.52  | 106 | 1.65  | 2.26  | 98 | 1.45  | 2.16  | 94 | 1.90  | 2.61  |               |                   |
| Care-as-usual                                  | ..         | ..  | .. | 109 | 1.39  | 2.32  | 106 | 1.69  | 2.81  | 98 | 1.43  | 2.28  | 87 | 1.66  | 2.59  |               |                   |
| Relationship dissatisfaction                   |            |     |    |     |       |       |     |       |       |    |       |       |    |       |       |               |                   |
| MMQ Marital scale                              |            |     |    |     |       |       |     |       |       |    |       |       |    |       |       | 4.79(8)       | 0.78              |
| Intervention                                   | ..         | ..  | .. | 90  | 10.06 | 11.53 | 89  | 9.97  | 11.57 | 83 | 10.29 | 11.74 | 78 | 11.45 | 13.30 |               |                   |
| Care-as-usual                                  | ..         | ..  | .. | 84  | 11.76 | 15.35 | 80  | 10.75 | 12.44 | 72 | 10.08 | 9.58  | 66 | 10.85 | 11.16 |               |                   |

**Supplementary appendix 3** *Continued*

| Outcome measure (range score)                    | Assessment |     |    |     |       |       |     |       |       |    |       |       |    |       |       | GLMM outcomes |                   |
|--------------------------------------------------|------------|-----|----|-----|-------|-------|-----|-------|-------|----|-------|-------|----|-------|-------|---------------|-------------------|
|                                                  | T1         |     |    | T2  |       |       | T3  |       |       | T4 |       |       | T5 |       |       | LRT(df)       | P (overall model) |
|                                                  | N          | M/% | SD | N   | M/%   | SD    | N   | M/%   | SD    | N  | M/%   | SD    | N  | M/%   | SD    |               |                   |
| Psychological distress<br>HADS Total (0-42)      | ..         | ..  | .. | 107 | 9.95  | 7.30  | 105 | 9.87  | 7.14  | 98 | 9.46  | 7.33  | 94 | 8.93  | 7.74  | 5.87(8)       | 0.66              |
| Intervention                                     | ..         | ..  | .. | 107 | 9.93  | 7.65  | 106 | 9.80  | 7.32  | 98 | 10.00 | 6.83  | 87 | 9.32  | 6.63  |               |                   |
| Care-as-usual                                    | ..         | ..  | .. | 107 | 9.93  | 7.65  | 106 | 9.80  | 7.32  | 98 | 10.00 | 6.83  | 87 | 9.32  | 6.63  |               |                   |
| Psychological distress<br>HADS depression (0-21) | ..         | ..  | .. | 107 | 4.22  | 3.68  | 105 | 4.13  | 3.89  | 98 | 3.87  | 3.62  | 94 | 3.47  | 3.79  | 5.96(8)       | 0.65              |
| Intervention                                     | ..         | ..  | .. | 107 | 4.36  | 4.03  | 106 | 4.01  | 3.86  | 98 | 4.21  | 3.64  | 87 | 3.41  | 3.36  |               |                   |
| Care-as-usual                                    | ..         | ..  | .. | 107 | 4.36  | 4.03  | 106 | 4.01  | 3.86  | 98 | 4.21  | 3.64  | 87 | 3.41  | 3.36  |               |                   |
| Psychological distress<br>HADS anxiety (0-21)    | ..         | ..  | .. | 107 | 5.74  | 4.29  | 105 | 5.73  | 3.89  | 98 | 5.59  | 4.36  | 94 | 5.38  | 4.48  | 7.48(8)       | 0.49              |
| Intervention                                     | ..         | ..  | .. | 107 | 5.57  | 4.34  | 106 | 5.79  | 4.27  | 98 | 5.79  | 4.07  | 87 | 5.91  | 4.03  |               |                   |
| Care-as-usual                                    | ..         | ..  | .. | 107 | 5.57  | 4.34  | 106 | 5.79  | 4.27  | 98 | 5.79  | 4.07  | 87 | 5.91  | 4.03  |               |                   |
| Physical function<br>EORTC QLQ-C30 (0-100)       | ..         | ..  | .. | 107 | 82.12 | 16.60 | 105 | 85.91 | 16.39 | 98 | 88.57 | 13.02 | 94 | 92.27 | 10.81 | 8.28(8)       | 0.41              |
| Intervention                                     | ..         | ..  | .. | 109 | 81.22 | 16.89 | 106 | 86.04 | 14.59 | 98 | 88.10 | 13.17 | 86 | 91.32 | 11.57 |               |                   |
| Care-as-usual                                    | ..         | ..  | .. | 109 | 81.22 | 16.89 | 106 | 86.04 | 14.59 | 98 | 88.10 | 13.17 | 86 | 91.32 | 11.57 |               |                   |
| Role function<br>EORTC QLQ-C30 (0-100)           | ..         | ..  | .. | 107 | 66.04 | 30.45 | 106 | 71.23 | 27.65 | 98 | 72.79 | 29.05 | 94 | 80.50 | 24.15 | 17.12(8)      | 0.03*             |
| Intervention                                     | ..         | ..  | .. | 109 | 66.67 | 25.36 | 106 | 69.81 | 25.73 | 98 | 75.17 | 23.96 | 87 | 82.95 | 23.29 |               |                   |
| Care-as-usual                                    | ..         | ..  | .. | 109 | 66.67 | 25.36 | 106 | 69.81 | 25.73 | 98 | 75.17 | 23.96 | 87 | 82.95 | 23.29 |               |                   |
| Emotional function<br>EORTC QLQ-C30 (0-100)      | ..         | ..  | .. | 107 | 70.25 | 20.92 | 106 | 71.78 | 20.88 | 98 | 71.51 | 21.37 | 94 | 73.49 | 23.02 | 9.16(8)       | 0.33              |
| Intervention                                     | ..         | ..  | .. | 109 | 66.67 | 23.07 | 106 | 67.37 | 23.60 | 98 | 67.18 | 23.32 | 87 | 73.85 | 19.70 |               |                   |
| Care-as-usual                                    | ..         | ..  | .. | 109 | 66.67 | 23.07 | 106 | 67.37 | 23.60 | 98 | 67.18 | 23.32 | 87 | 73.85 | 19.70 |               |                   |
| Cognitive function<br>EORTC QLQ-C30 (0-100)      | ..         | ..  | .. | 107 | 71.18 | 23.52 | 106 | 74.06 | 20.97 | 98 | 68.71 | 25.02 | 94 | 72.87 | 24.32 | 11.47(8)      | 0.18              |
| Intervention                                     | ..         | ..  | .. | 109 | 68.65 | 24.19 | 106 | 70.44 | 23.15 | 98 | 72.11 | 25.19 | 87 | 76.05 | 23.80 |               |                   |
| Care-as-usual                                    | ..         | ..  | .. | 109 | 68.65 | 24.19 | 106 | 70.44 | 23.15 | 98 | 72.11 | 25.19 | 87 | 76.05 | 23.80 |               |                   |
| Social function<br>EORTC QLQ-C30 (0-100)         | ..         | ..  | .. | 107 | 67.76 | 27.31 | 106 | 73.74 | 25.09 | 98 | 76.53 | 24.27 | 94 | 83.51 | 19.48 | 9.7(8)        | 0.29              |
| Intervention                                     | ..         | ..  | .. | 109 | 68.20 | 26.11 | 106 | 73.11 | 24.08 | 98 | 77.38 | 20.20 | 87 | 82.38 | 20.70 |               |                   |
| Care-as-usual                                    | ..         | ..  | .. | 109 | 68.20 | 26.11 | 106 | 73.11 | 24.08 | 98 | 77.38 | 20.20 | 87 | 82.38 | 20.70 |               |                   |
| Fatigue<br>EORTC QLQ-C30 (0-100)                 | ..         | ..  | .. | 107 | 41.85 | 22.41 | 106 | 36.16 | 23.36 | 98 | 36.40 | 20.54 | 94 | 30.14 | 23.98 | 22.63(8)      | 0.004*            |
| Intervention                                     | ..         | ..  | .. | 108 | 44.65 | 23.63 | 105 | 40.42 | 23.22 | 98 | 36.84 | 22.82 | 87 | 28.86 | 23.57 |               |                   |
| Care-as-usual                                    | ..         | ..  | .. | 108 | 44.65 | 23.63 | 105 | 40.42 | 23.22 | 98 | 36.84 | 22.82 | 87 | 28.86 | 23.57 |               |                   |

**Supplementary appendix 3** *Continued*

| Outcome measure (range score) | Assessment |     |    |     |       |       |     |       |       |    |       |       |    |       |       | GLMM outcomes |                   |
|-------------------------------|------------|-----|----|-----|-------|-------|-----|-------|-------|----|-------|-------|----|-------|-------|---------------|-------------------|
|                               | T1         |     |    | T2  |       |       | T3  |       |       | T4 |       |       | T5 |       |       | LRT(df)       | P (overall model) |
|                               | N          | M/% | SD | N   | M/%   | SD    | N   | M/%   | SD    | N  | M/%   | SD    | N  | M/%   | SD    |               |                   |
| Nausea/vomiting               |            |     |    |     |       |       |     |       |       |    |       |       |    |       |       |               |                   |
| EORTC QLQ-C30 (0-100)         |            |     |    |     |       |       |     |       |       |    |       |       |    |       |       | 6.45(6)       | 0.38              |
| Intervention                  | ..         | ..  | .. | 107 | 5.61  | 10.97 | 106 | 7.55  | 16.92 | 97 | 7.05  | 14.60 | 94 | 6.74  | 13.23 |               |                   |
| Care-as-usual                 | ..         | ..  | .. | 109 | 8.26  | 12.75 | 106 | 5.35  | 14.47 | 98 | 5.61  | 10.42 | 87 | 4.02  | 8.79  |               |                   |
| Pain                          |            |     |    |     |       |       |     |       |       |    |       |       |    |       |       |               |                   |
| EORTC QLQ-C30 (0-100)         |            |     |    |     |       |       |     |       |       |    |       |       |    |       |       | 6.34(8)       | 0.61              |
| Intervention                  | ..         | ..  | .. | 107 | 20.09 | 20.57 | 106 | 19.18 | 21.18 | 97 | 20.96 | 23.97 | 94 | 16.67 | 22.0  |               |                   |
| Care-as-usual                 | ..         | ..  | .. | 109 | 19.88 | 23.18 | 106 | 19.81 | 24.03 | 98 | 20.41 | 23.88 | 87 | 14.18 | 19.94 |               |                   |
| Dyspnoea                      |            |     |    |     |       |       |     |       |       |    |       |       |    |       |       |               |                   |
| EORTC QLQ-C30 (0-100)         |            |     |    |     |       |       |     |       |       |    |       |       |    |       |       | 3.23(8)       | 0.92              |
| Intervention                  | ..         | ..  | .. | 107 | 17.45 | 23.50 | 106 | 11.95 | 17.33 | 98 | 9.18  | 18.40 | 94 | 10.28 | 20.75 |               |                   |
| Care-as-usual                 | ..         | ..  | .. | 109 | 16.82 | 21.58 | 106 | 14.47 | 18.98 | 98 | 11.22 | 21.38 | 87 | 7.66  | 15.83 |               |                   |
| Sleep disturbance             |            |     |    |     |       |       |     |       |       |    |       |       |    |       |       |               |                   |
| EORTC QLQ-C30 (0-100)         |            |     |    |     |       |       |     |       |       |    |       |       |    |       |       | 9.71(8)       | 0.29              |
| Intervention                  | ..         | ..  | .. | 107 | 36.14 | 29.0  | 106 | 32.39 | 31.02 | 98 | 31.63 | 29.65 | 94 | 30.14 | 31.71 |               |                   |
| Care-as-usual                 | ..         | ..  | .. | 109 | 30.89 | 29.64 | 106 | 28.62 | 30.32 | 98 | 29.59 | 26.17 | 87 | 27.20 | 27.15 |               |                   |
| Appetite loss                 |            |     |    |     |       |       |     |       |       |    |       |       |    |       |       |               |                   |
| EORTC QLQ-C30 (0-100)         |            |     |    |     |       |       |     |       |       |    |       |       |    |       |       | 1.82(6)       | 0.94              |
| Intervention                  | ..         | ..  | .. | 107 | 9.66  | 15.87 | 106 | 10.06 | 19.61 | 98 | 8.84  | 18.88 | 94 | 6.74  | 16.0  |               |                   |
| Care-as-usual                 | ..         | ..  | .. | 109 | 13.76 | 22.32 | 106 | 7.86  | 17.55 | 98 | 7.48  | 16.25 | 87 | 6.13  | 15.69 |               |                   |
| Constipation                  |            |     |    |     |       |       |     |       |       |    |       |       |    |       |       |               |                   |
| EORTC QLQ-C30 (0-100)         |            |     |    |     |       |       |     |       |       |    |       |       |    |       |       | 1.53(8)       | 0.99              |
| Intervention                  | ..         | ..  | .. | 107 | 10.28 | 18.55 | 106 | 10.06 | 18.50 | 97 | 12.72 | 21.75 | 94 | 10.28 | 18.31 |               |                   |
| Care-as-usual                 | ..         | ..  | .. | 109 | 10.40 | 22.54 | 106 | 6.60  | 15.55 | 98 | 11.57 | 24.92 | 87 | 7.28  | 18.63 |               |                   |
| Diarrhoea                     |            |     |    |     |       |       |     |       |       |    |       |       |    |       |       |               |                   |
| EORTC QLQ-C30 (0-100)         |            |     |    |     |       |       |     |       |       |    |       |       |    |       |       | 3.51(8)       | 0.90              |
| Intervention                  | ..         | ..  | .. | 107 | 13.08 | 19.83 | 106 | 14.78 | 22.58 | 98 | 15.31 | 23.04 | 94 | 11.35 | 18.65 |               |                   |
| Care-as-usual                 | ..         | ..  | .. | 109 | 19.57 | 24.52 | 106 | 17.61 | 26.11 | 98 | 18.37 | 23.02 | 87 | 12.64 | 19.85 |               |                   |
| Financial impact              |            |     |    |     |       |       |     |       |       |    |       |       |    |       |       |               |                   |
| EORTC QLQ-C30 (0-100)         |            |     |    |     |       |       |     |       |       |    |       |       |    |       |       | 2.9(8)        | 0.94              |
| Intervention                  | ..         | ..  | .. | 107 | 12.46 | 23.58 | 106 | 13.21 | 23.76 | 98 | 11.91 | 20.45 | 94 | 11.35 | 21.06 |               |                   |
| Care-as-usual                 | ..         | ..  | .. | 109 | 15.60 | 25.49 | 106 | 11.01 | 22.41 | 98 | 10.20 | 20.54 | 87 | 14.18 | 25.74 |               |                   |
| Global QoL                    |            |     |    |     |       |       |     |       |       |    |       |       |    |       |       |               |                   |
| EORTC QLQ-C30 (0-100)         |            |     |    |     |       |       |     |       |       |    |       |       |    |       |       | 7.2(8)        | 0.51              |
| Intervention                  | ..         | ..  | .. | 107 | 64.95 | 16.42 | 106 | 69.18 | 18.59 | 98 | 69.98 | 16.91 | 94 | 73.49 | 16.71 |               |                   |
| Care-as-usual                 | ..         | ..  | .. | 109 | 67.05 | 17.98 | 106 | 68.24 | 17.06 | 98 | 69.05 | 18.27 | 87 | 75.58 | 15.29 |               |                   |

**Supplementary appendix 3** *Continued*

| Outcome measure (range score)                  | Assessment |      |    |     |       |       |     |       |       |    |       |       |    |       |       | GLMM outcomes |                   |  |  |
|------------------------------------------------|------------|------|----|-----|-------|-------|-----|-------|-------|----|-------|-------|----|-------|-------|---------------|-------------------|--|--|
|                                                | T1         |      |    | T2  |       |       | T3  |       |       | T4 |       |       | T5 |       |       | LRT(df)       | P (overall model) |  |  |
|                                                | N          | M/%  | SD | N   | M/%   | SD    | N   | M/%   | SD    | N  | M/%   | SD    | N  | M/%   | SD    |               |                   |  |  |
| Gynaecological cancer treatment related stress |            |      |    |     |       |       |     |       |       |    |       |       |    |       |       | 6-03(8)       | 0-64              |  |  |
| IES Total (0-75)                               |            |      |    |     |       |       |     |       |       |    |       |       |    |       |       |               |                   |  |  |
| Intervention                                   | ..         | ..   | .. | 107 | 24-09 | 16-61 | 105 | 20-05 | 15-83 | 98 | 19-12 | 16-46 | 94 | 17-49 | 16-24 |               |                   |  |  |
| Care-as-usual                                  | ..         | ..   | .. | 107 | 24-24 | 17-33 | 106 | 21-65 | 16-06 | 98 | 20-95 | 15-93 | 87 | 18-66 | 16-10 |               |                   |  |  |
| <b>Physician-assessed</b>                      |            |      |    |     |       |       |     |       |       |    |       |       |    |       |       |               |                   |  |  |
| Stenosis (shortening/tightening) CTCAE         |            |      |    |     |       |       |     |       |       |    |       |       |    |       |       | 8-83(5)       | 0-12              |  |  |
| Intervention                                   |            |      |    |     |       |       |     |       |       |    |       |       |    |       |       |               |                   |  |  |
| Grade 0                                        | 96         | 90-6 | .. | 75  | 83-3  | ..    | 62  | 70-5  | ..    | 57 | 64-0  | ..    | 56 | 63-6  | ..    |               |                   |  |  |
| Grade 1                                        | 8          | 7-5  | .. | 11  | 12-2  | ..    | 20  | 22-7  | ..    | 26 | 29-2  | ..    | 21 | 23-9  | ..    |               |                   |  |  |
| Grade 2                                        | 1          | 0-9  | .. | 4   | 4-4   | ..    | 5   | 5-7   | ..    | 2  | 2-2   | ..    | 10 | 11-4  | ..    |               |                   |  |  |
| Grade 3                                        | 1          | 0-9  | .. | 0   | 0     | ..    | 1   | 1-1   | ..    | 4  | 4-5   | ..    | 1  | 1-1   | ..    |               |                   |  |  |
| Care-as-usual                                  |            |      |    |     |       |       |     |       |       |    |       |       |    |       |       |               |                   |  |  |
| Grade 0                                        | 110        | 94-0 | .. | 82  | 79-6  | ..    | 77  | 78-6  | ..    | 66 | 67-3  | ..    | 56 | 65-1  | ..    |               |                   |  |  |
| Grade 1                                        | 4          | 3-4  | .. | 19  | 18-4  | ..    | 14  | 14-3  | ..    | 22 | 22-4  | ..    | 20 | 23-3  | ..    |               |                   |  |  |
| Grade 2                                        | 3          | 2-6  | .. | 2   | 1-9   | ..    | 4   | 4-1   | ..    | 8  | 8-2   | ..    | 8  | 9-3   | ..    |               |                   |  |  |
| Grade 3                                        | 0          | 0    | .. | 0   | 0     | ..    | 3   | 3-1   | ..    | 2  | 2-0   | ..    | 2  | 2-3   | ..    |               |                   |  |  |
| Dryness CTCAE                                  |            |      |    |     |       |       |     |       |       |    |       |       |    |       |       | 4-64(5)       | 0-46              |  |  |
| Intervention                                   |            |      |    |     |       |       |     |       |       |    |       |       |    |       |       |               |                   |  |  |
| Grade 0                                        | 99         | 96-1 | .. | 77  | 85-6  | ..    | 57  | 65-5  | ..    | 59 | 68-6  | ..    | 60 | 70-6  | ..    |               |                   |  |  |
| Grade 1                                        | 2          | 1-9  | .. | 12  | 13-3  | ..    | 20  | 23-0  | ..    | 17 | 19-8  | ..    | 18 | 21-2  | ..    |               |                   |  |  |
| Grade 2                                        | 1          | 1-0  | .. | 1   | 1-1   | ..    | 10  | 11-5  | ..    | 8  | 9-3   | ..    | 6  | 7-1   | ..    |               |                   |  |  |
| Grade 3                                        | 1          | 1-0  | .. | 0   | 0     | ..    | 0   | 0     | ..    | 2  | 2-3   | ..    | 1  | 1-2   | ..    |               |                   |  |  |
| Care-as-usual                                  |            |      |    |     |       |       |     |       |       |    |       |       |    |       |       |               |                   |  |  |
| Grade 0                                        | 103        | 92-8 | .. | 80  | 78-4  | ..    | 73  | 74-5  | ..    | 69 | 72-6  | ..    | 55 | 67-1  | ..    |               |                   |  |  |
| Grade 1                                        | 4          | 3-6  | .. | 19  | 18-6  | ..    | 24  | 24-5  | ..    | 24 | 25-3  | ..    | 26 | 31-7  | ..    |               |                   |  |  |
| Grade 2                                        | 4          | 3-6  | .. | 2   | 2-0   | ..    | 1   | 1-0   | ..    | 2  | 2-1   | ..    | 1  | 1-2   | ..    |               |                   |  |  |
| Grade 3                                        | 0          | 0    | .. | 1   | 1-0   | ..    | 0   | 0     | ..    | 0  | 0     | ..    | 0  | 0     | ..    |               |                   |  |  |
| Bleeding CTCAE                                 |            |      |    |     |       |       |     |       |       |    |       |       |    |       |       | 7-6(5)        | 0-18              |  |  |
| Intervention                                   |            |      |    |     |       |       |     |       |       |    |       |       |    |       |       |               |                   |  |  |
| Grade 0                                        | 47         | 42-3 | .. | 94  | 87-0  | ..    | 81  | 86-2  | ..    | 76 | 82-6  | ..    | 78 | 83-0  | ..    |               |                   |  |  |
| Grade 1                                        | 32         | 28-8 | .. | 11  | 10-2  | ..    | 13  | 13-8  | ..    | 15 | 16-3  | ..    | 14 | 14-9  | ..    |               |                   |  |  |
| Grade 2                                        | 26         | 23-4 | .. | 3   | 2-8   | ..    | 0   | 0     | ..    | 1  | 1-1   | ..    | 2  | 2-1   | ..    |               |                   |  |  |
| Grade 3                                        | 6          | 5-4  | .. | 0   | 0     | ..    | 0   | 0     | ..    | 0  | 0     | ..    | 0  | 0     | ..    |               |                   |  |  |
| Care-as-usual                                  |            |      |    |     |       |       |     |       |       |    |       |       |    |       |       |               |                   |  |  |
| Grade 0                                        | 51         | 43-6 | .. | 102 | 91-1  | ..    | 88  | 81-5  | ..    | 78 | 77-2  | ..    | 72 | 80-0  | ..    |               |                   |  |  |
| Grade 1                                        | 32         | 27-4 | .. | 10  | 8-9   | ..    | 19  | 17-6  | ..    | 22 | 21-8  | ..    | 17 | 18-9  | ..    |               |                   |  |  |
| Grade 2                                        | 31         | 26-5 | .. | 0   | 0     | ..    | 1   | 0-9   | ..    | 1  | 1-0   | ..    | 1  | 1-1   | ..    |               |                   |  |  |
| Grade 3                                        | 3          | 2-6  | .. | 0   | 0     | ..    | 0   | 0     | ..    | 0  | 0     | ..    | 0  | 0     | ..    |               |                   |  |  |

**Supplementary appendix 3** *Continued*

| Outcome measure (range score) | Assessment |         |    |    |         |    |    |         |    |    |         |    |    |         |    | GLMM outcomes |                   |
|-------------------------------|------------|---------|----|----|---------|----|----|---------|----|----|---------|----|----|---------|----|---------------|-------------------|
|                               | T1         |         |    | T2 |         |    | T3 |         |    | T4 |         |    | T5 |         |    | LRT(df)       | P (overall model) |
|                               | N          | M/<br>% | SD | N  | M/<br>% | SD | N  | M/<br>% | SD | N  | M/<br>% | SD | N  | M/<br>% | SD |               |                   |
| <b>Mucositis CTCAE</b>        |            |         |    |    |         |    |    |         |    |    |         |    |    |         |    |               |                   |
| Intervention                  |            |         |    |    |         |    |    |         |    |    |         |    |    |         |    | 11.04(5)      | 0.05*             |
| Grade 0                       | 104        | 97.2    | .. | 51 | 53.1    | .. | 68 | 74.7    | .. | 74 | 86.0    | .. | 72 | 80.9    | .. |               |                   |
| Grade 1                       | 3          | 2.8     | .. | 41 | 42.7    | .. | 21 | 23.1    | .. | 10 | 11.6    | .. | 13 | 14.6    | .. |               |                   |
| Grade 2                       | 0          | 0       | .. | 4  | 4.2     | .. | 2  | 2.2     | .. | 1  | 1.2     | .. | 3  | 3.4     | .. |               |                   |
| Grade 3                       | 0          | 0       | .. | 0  | 0       | .. | 0  | 0       | .. | 1  | 1.2     | .. | 1  | 1.1     | .. |               |                   |
| Grade 4                       | 0          | 0       | .. | 0  | 0       | .. | 0  | 0       | .. | 0  | 0       | .. | 0  | 0       | .. |               |                   |
| Care-as-usual                 |            |         |    |    |         |    |    |         |    |    |         |    |    |         |    |               |                   |
| Grade 0                       | 111        | 95.7    | .. | 54 | 50.9    | .. | 68 | 71.6    | .. | 81 | 84.4    | .. | 70 | 82.4    | .. |               |                   |
| Grade 1                       | 4          | 3.4     | .. | 46 | 43.4    | .. | 21 | 22.1    | .. | 12 | 12.5    | .. | 13 | 15.3    | .. |               |                   |
| Grade 2                       | 1          | 0.9     | .. | 5  | 4.7     | .. | 2  | 2.1     | .. | 2  | 2.1     | .. | 2  | 2.4     | .. |               |                   |
| Grade 3                       | 0          | 0       | .. | 1  | 0.9     | .. | 3  | 3.2     | .. | 1  | 1.0     | .. | 0  | 0       | .. |               |                   |
| Grade 4                       | 0          | 0       | .. | 0  | 0       | .. | 1  | 1.1     | .. | 0  | 0       | .. | 0  | 0       | .. |               |                   |
| <b>Discharge CTCAE</b>        |            |         |    |    |         |    |    |         |    |    |         |    |    |         |    |               |                   |
| Intervention                  |            |         |    |    |         |    |    |         |    |    |         |    |    |         |    | 1.65(5)       | 0.90              |
| Grade 0                       | 73         | 67.0    | .. | 57 | 53.8    | .. | 60 | 64.5    | .. | 66 | 73.3    | .. | 65 | 70.7    | .. |               |                   |
| Grade 1                       | 23         | 21.1    | .. | 45 | 42.5    | .. | 30 | 32.3    | .. | 23 | 25.6    | .. | 24 | 26.1    | .. |               |                   |
| Grade 2                       | 13         | 11.9    | .. | 4  | 3.8     | .. | 3  | 3.2     | .. | 1  | 1.1     | .. | 3  | 3.3     | .. |               |                   |
| Grade 3                       | 0          | 0       | .. | 0  | 0       | .. | 0  | 0       | .. | 0  | 0       | .. | 0  | 0       | .. |               |                   |
| Care-as-usual                 |            |         |    |    |         |    |    |         |    |    |         |    |    |         |    |               |                   |
| Grade 0                       | 70         | 61.4    | .. | 56 | 50.5    | .. | 66 | 63.5    | .. | 69 | 70.4    | .. | 62 | 68.9    | .. |               |                   |
| Grade 1                       | 33         | 28.9    | .. | 43 | 38.7    | .. | 29 | 27.9    | .. | 20 | 20.4    | .. | 27 | 30.0    | .. |               |                   |
| Grade 2                       | 11         | 9.6     | .. | 12 | 10.8    | .. | 9  | 8.7     | .. | 9  | 9.2     | .. | 1  | 1.1     | .. |               |                   |
| Grade 3                       | 0          | 0       | .. | 0  | 0       | .. | 0  | 0       | .. | 0  | 0       | .. | 0  | 0       | .. |               |                   |
| <b>Fibrosis CTCAE</b>         |            |         |    |    |         |    |    |         |    |    |         |    |    |         |    |               |                   |
| Intervention                  |            |         |    |    |         |    |    |         |    |    |         |    |    |         |    | 3.03(5)       | 0.70              |
| Grade 0                       | 104        | 98.1    | .. | 93 | 97.9    | .. | 74 | 85.1    | .. | 66 | 77.6    | .. | 58 | 67.4    | .. |               |                   |
| Grade 1                       | 2          | 1.9     | .. | 2  | 2.1     | .. | 13 | 14.9    | .. | 18 | 21.2    | .. | 25 | 29.1    | .. |               |                   |
| Grade 2                       | 0          | 0       | .. | 0  | 0       | .. | 0  | 0       | .. | 1  | 1.2     | .. | 2  | 2.3     | .. |               |                   |
| Grade 3                       | 0          | 0       | .. | 0  | 0       | .. | 0  | 0       | .. | 0  | 0       | .. | 1  | 1.2     | .. |               |                   |
| Care-as-usual                 |            |         |    |    |         |    |    |         |    |    |         |    |    |         |    |               |                   |
| Grade 0                       | 111        | 96.5    | .. | 88 | 88.9    | .. | 79 | 85.9    | .. | 77 | 80.2    | .. | 60 | 72.3    | .. |               |                   |
| Grade 1                       | 3          | 2.6     | .. | 11 | 11.1    | .. | 13 | 14.1    | .. | 15 | 15.6    | .. | 22 | 26.5    | .. |               |                   |
| Grade 2                       | 1          | 0.9     | .. | 0  | 0       | .. | 0  | 0       | .. | 3  | 3.1     | .. | 1  | 1.2     | .. |               |                   |
| Grade 3                       | 0          | 0       | .. | 0  | 0       | .. | 0  | 0       | .. | 1  | 1.0     | .. | 0  | 0       | .. |               |                   |

**Supplementary appendix 3** *Continued*

| Outcome measure (range score)       | Assessment |         |    |    |         |    |    |         |    |    |         |    |    |         |    | GLMM outcomes |                   |      |
|-------------------------------------|------------|---------|----|----|---------|----|----|---------|----|----|---------|----|----|---------|----|---------------|-------------------|------|
|                                     | T1         |         |    | T2 |         |    | T3 |         |    | T4 |         |    | T5 |         |    | LRT(df)       | P (overall model) |      |
|                                     | N          | M/<br>% | SD | N  | M/<br>% | SD | N  | M/<br>% | SD | N  | M/<br>% | SD | N  | M/<br>% | SD |               |                   |      |
| <b>Atrophy/telangiectasia CTCAE</b> |            |         |    |    |         |    |    |         |    |    |         |    |    |         |    |               |                   |      |
| Intervention                        |            |         |    |    |         |    |    |         |    |    |         |    |    |         |    |               | 6.29(4)           | 0.18 |
| Grade 0                             | 103        | 97.2    | .. | 81 | 87.1    | .. | 65 | 73.9    | .. | 51 | 63.0    | .. | 42 | 49.4    | .. |               |                   |      |
| Grade 1                             | 2          | 1.9     | .. | 12 | 12.9    | .. | 23 | 26.1    | .. | 29 | 35.8    | .. | 35 | 41.2    | .. |               |                   |      |
| Grade 2                             | 1          | 0.9     | .. | 0  | 0       | .. | 0  | 0       | .. | 1  | 1.2     | .. | 6  | 7.1     | .. |               |                   |      |
| Grade 3                             | 0          | 0       | .. | 0  | 0       | .. | 0  | 0       | .. | 0  | 0       | .. | 1  | 1.2     | .. |               |                   |      |
| Grade 4                             | 0          | 0       | .. | 0  | 0       | .. | 0  | 0       | .. | 0  | 0       | .. | 1  | 1.2     | .. |               |                   |      |
| Care-as-usual                       |            |         |    |    |         |    |    |         |    |    |         |    |    |         |    |               |                   |      |
| Grade 0                             | 115        | 100.0   | .. | 87 | 87.0    | .. | 68 | 76.4    | .. | 64 | 67.4    | .. | 42 | 52.5    | .. |               |                   |      |
| Grade 1                             | 0          | 0       | .. | 13 | 13.0    | .. | 20 | 22.5    | .. | 28 | 29.5    | .. | 36 | 45.0    | .. |               |                   |      |
| Grade 2                             | 0          | 0       | .. | 0  | 0       | .. | 1  | 1.1     | .. | 2  | 2.1     | .. | 1  | 1.3     | .. |               |                   |      |
| Grade 3                             | 0          | 0       | .. | 0  | 0       | .. | 0  | 0       | .. | 1  | 1.1     | .. | 1  | 1.3     | .. |               |                   |      |
| Grade 4                             | 0          | 0       | .. | 0  | 0       | .. | 0  | 0       | .. | 0  | 0       | .. | 0  | 0       | .. |               |                   |      |
| <b>Pain CTCAE</b>                   |            |         |    |    |         |    |    |         |    |    |         |    |    |         |    |               |                   |      |
| Intervention                        |            |         |    |    |         |    |    |         |    |    |         |    |    |         |    |               | 1.53(5)           | 0.91 |
| Grade 0                             | 92         | 87.6    | .. | 91 | 90.1    | .. | 87 | 88.8    | .. | 82 | 91.1    | .. | 80 | 88.9    | .. |               |                   |      |
| Grade 1                             | 11         | 10.5    | .. | 8  | 7.9     | .. | 11 | 11.2    | .. | 7  | 7.8     | .. | 5  | 5.6     | .. |               |                   |      |
| Grade 2                             | 2          | 1.9     | .. | 2  | 2.0     | .. | 0  | 0       | .. | 1  | 1.1     | .. | 5  | 5.6     | .. |               |                   |      |
| Grade 3                             | 0          | 0       | .. | 0  | 0       | .. | 0  | 0       | .. | 0  | 0       | .. | 0  | 0       | .. |               |                   |      |
| Care-as-usual                       |            |         |    |    |         |    |    |         |    |    |         |    |    |         |    |               |                   |      |
| Grade 0                             | 107        | 92.2    | .. | 90 | 80.4    | .. | 94 | 87.9    | .. | 87 | 88.8    | .. | 80 | 90.9    | .. |               |                   |      |
| Grade 1                             | 7          | 6.0     | .. | 20 | 17.9    | .. | 9  | 8.4     | .. | 8  | 8.2     | .. | 8  | 9.1     | .. |               |                   |      |
| Grade 2                             | 2          | 1.7     | .. | 2  | 1.8     | .. | 3  | 2.8     | .. | 2  | 2.0     | .. | 0  | 0       | .. |               |                   |      |
| Grade 3                             | 0          | 0       | .. | 0  | 0       | .. | 1  | 0.9     | .. | 1  | 1.0     | .. | 0  | 0       | .. |               |                   |      |
| <b>Dyspareunia CTCAE</b>            |            |         |    |    |         |    |    |         |    |    |         |    |    |         |    |               |                   |      |
| Intervention                        |            |         |    |    |         |    |    |         |    |    |         |    |    |         |    |               | 1.37(5)           | 0.93 |
| Grade 0                             | 74         | 91.4    | .. | 45 | 80.4    | .. | 45 | 62.5    | .. | 50 | 61.7    | .. | 54 | 64.3    | .. |               |                   |      |
| Grade 1                             | 3          | 3.7     | .. | 9  | 16.1    | .. | 21 | 29.2    | .. | 24 | 29.6    | .. | 24 | 28.6    | .. |               |                   |      |
| Grade 2                             | 2          | 2.5     | .. | 2  | 3.6     | .. | 5  | 6.9     | .. | 5  | 6.2     | .. | 4  | 4.8     | .. |               |                   |      |
| Grade 3                             | 2          | 2.5     | .. | 0  | 0       | .. | 1  | 1.4     | .. | 2  | 2.5     | .. | 2  | 2.4     | .. |               |                   |      |
| Care-as-usual                       |            |         |    |    |         |    |    |         |    |    |         |    |    |         |    |               |                   |      |
| Grade 0                             | 73         | 84.9    | .. | 34 | 64.2    | .. | 49 | 63.6    | .. | 50 | 64.9    | .. | 50 | 71.4    | .. |               |                   |      |
| Grade 1                             | 10         | 11.6    | .. | 15 | 28.3    | .. | 18 | 23.4    | .. | 17 | 22.1    | .. | 14 | 20.0    | .. |               |                   |      |
| Grade 2                             | 3          | 3.5     | .. | 3  | 5.7     | .. | 9  | 11.7    | .. | 8  | 10.4    | .. | 5  | 7.1     | .. |               |                   |      |
| Grade 3                             | 0          | 0       | .. | 1  | 1.9     | .. | 1  | 1.3     | .. | 2  | 2.6     | .. | 1  | 1.4     | .. |               |                   |      |

*Note.* CTCAE = Common Terminology Criteria for Adverse Events; df = degrees of freedom; EORTC QLQ-C30 = European Organization for Research and Treatment of Cancer Quality of Life Questionnaire-Core 30; EORTC QLQ-CX24 = European Organization for Research and Treatment of Cancer Quality of Life Questionnaire-Gynaecological Cancer Module; EORTC QLQ-EN24 = European Organization for Research and Treatment of Cancer Quality of Life Questionnaire-Endometrial Cancer Module; FSQS = Female Sexual Distress Scale; FSFI = Female Sexual Function Index; FSQ = Fear of Sexuality Questionnaire; GLMM = Generalized Linear Mixed effects Model; HADS = Hospital Anxiety and Depression Scale; IES = Impact of Event Scale; IQR = interquartile range; M = mean; Md = median; MMQ = Maudsley Marital Questionnaire; N = observed number of women at the specific timepoint; QoL = Quality of Life; SD = standard deviation.

\*p < 0.05.

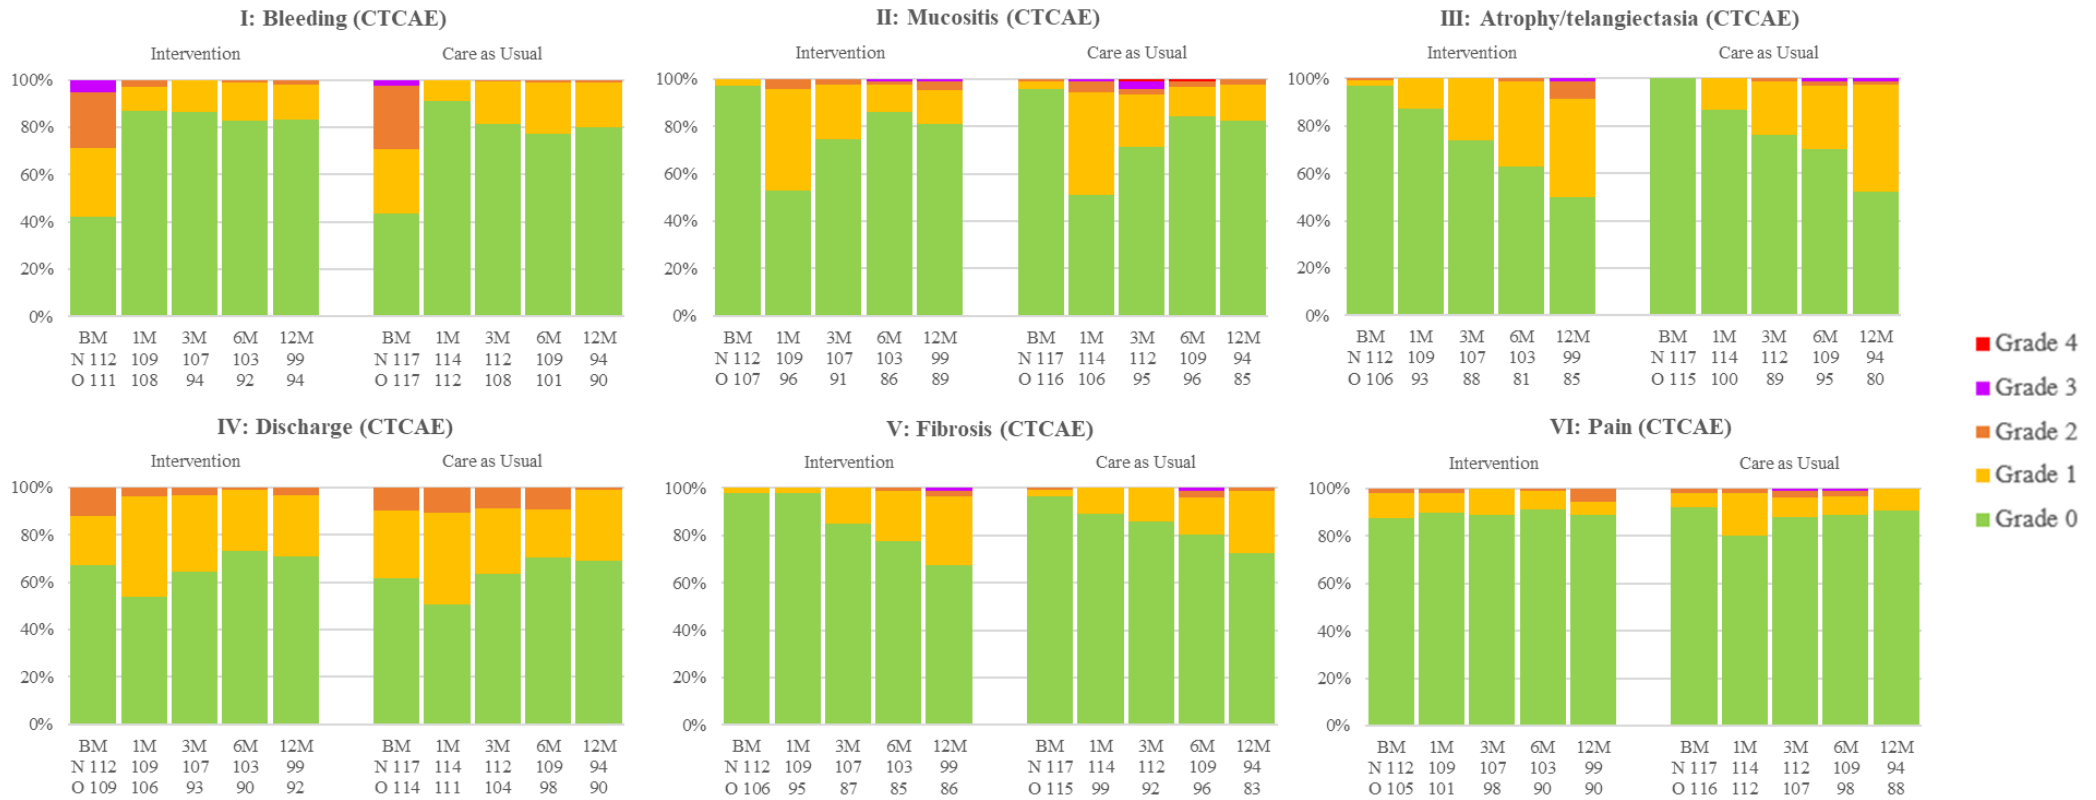

**Supplementary appendix 4** Physician-reported clinical measurements on single item level over time. The proportion of women is shown in percentages. BM = baseline measurement; CTCAE = Common Terminology Criteria for Adverse Events; M = months; N = number of women at risk at the specific timepoint; O = observed number of women at the specific timepoint.

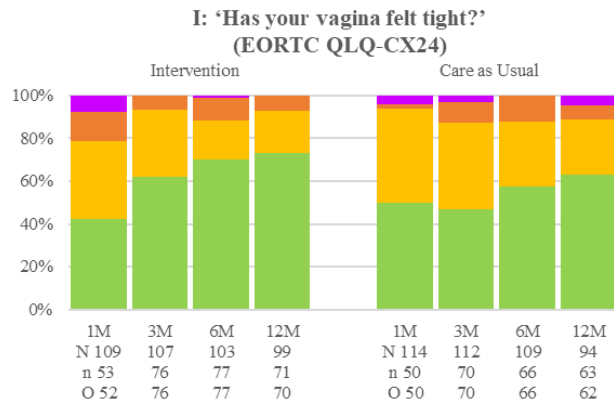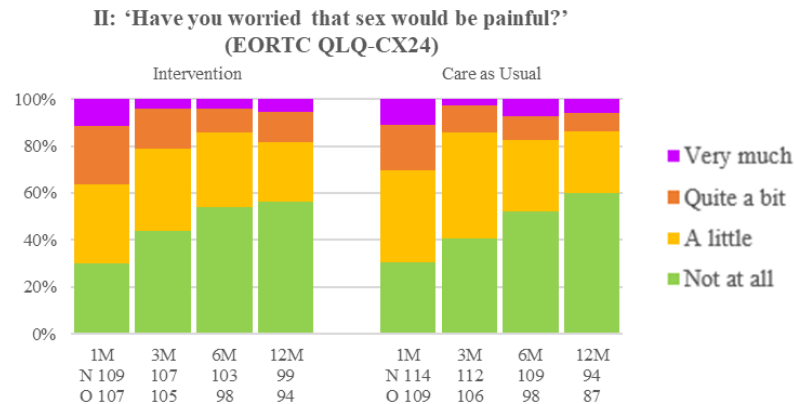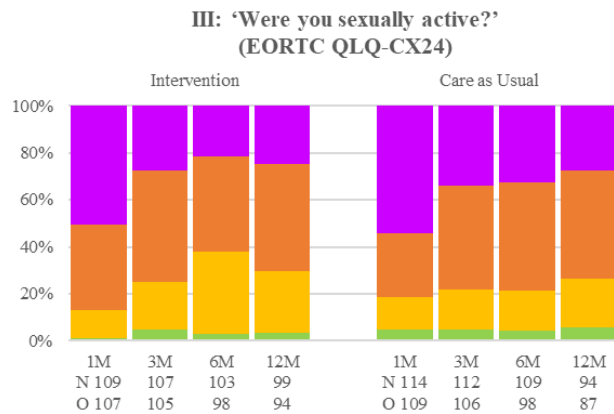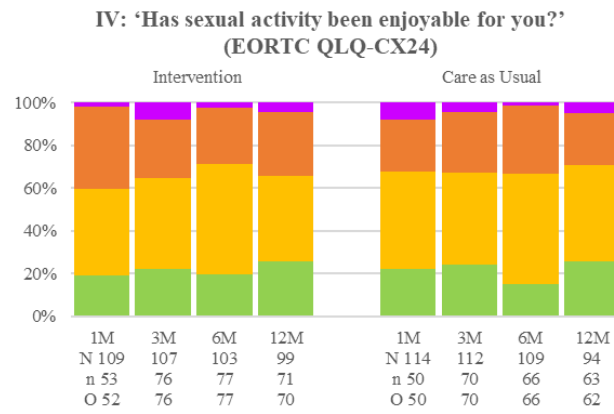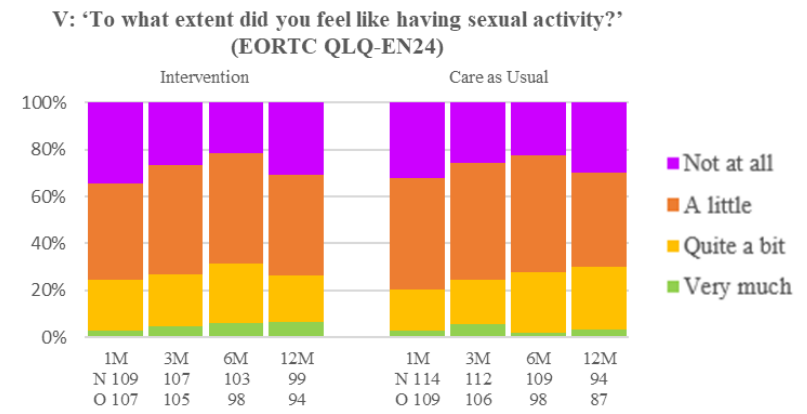

**Supplementary appendix 5** Patient-reported vaginal functioning problems on single item level over time. The proportion of women is shown in percentages. Figure I and IV only includes sexually active women. EORTC QLQ-CX24 = European Organization for Research and Treatment of Cancer Quality of Life Questionnaire-Gynaecological Cancer Module; EORTC QLQ-EN24 = European Organization for Research and Treatment of Cancer Quality of Life Questionnaire-Endometrial Cancer Module; M = months; N = number of women at risk at the specific timepoint; n = number of sexually active women at risk at the specific timepoint according to EORTC QLQ-CX24 item 19; O = observed number of women at the specific timepoint.



**Supplementary appendix 6 The prevalence of women scoring at a clinical level on sexual functioning, sexual distress, relationship dissatisfaction, and psychological distress**

|                             | N   | n cut-off* | % cut-off* |
|-----------------------------|-----|------------|------------|
| <b>Primary Outcome</b>      |     |            |            |
| FSFItotal BM                |     |            |            |
| Intervention (total group)  | 112 | 33         | 29.5       |
| Care-as-usual (total group) | 117 | 29         | 24.8       |
| Sexually active             | 185 | 47         | 25.4       |
| Not sexually active         | 42  | 14         | 33.3       |
| Sexual intercourse          | 192 | 33         | 17.2       |
| No sexual intercourse       | 35  | 28         | 80.0       |
| FSFItotal 1M                |     |            |            |
| Intervention (total group)  | 108 | 80         | 74.1       |
| Care-as-usual (total group) | 110 | 82         | 74.5       |
| Sexually active             | 128 | 79         | 61.7       |
| Not sexually active         | 90  | 83         | 92.2       |
| Sexual intercourse          | 84  | 38         | 45.2       |
| No sexual intercourse       | 133 | 123        | 92.5       |
| FSFItotal 3M                |     |            |            |
| Intervention (total group)  | 106 | 67         | 63.2       |
| Care-as-usual (total group) | 106 | 65         | 61.3       |
| Sexually active             | 139 | 78         | 56.1       |
| Not sexually active         | 73  | 54         | 74.0       |
| Sexual intercourse          | 138 | 67         | 48.6       |
| No sexual intercourse       | 74  | 65         | 87.8       |
| FSFItotal 6M                |     |            |            |
| Intervention (total group)  | 98  | 49         | 50.0       |
| Care-as-usual (total group) | 98  | 54         | 55.1       |
| Sexually active             | 128 | 59         | 46.1       |
| Not sexually active         | 68  | 44         | 64.7       |
| Sexual intercourse          | 134 | 48         | 35.8       |
| No sexual intercourse       | 62  | 55         | 88.7       |
| FSFItotal 12M               |     |            |            |
| Intervention (total group)  | 94  | 53         | 56.4       |
| Care-as-usual (total group) | 87  | 47         | 54.0       |
| Sexually active             | 127 | 59         | 46.5       |
| Not sexually active         | 54  | 41         | 75.9       |
| Sexual intercourse          | 121 | 45         | 37.2       |
| No sexual intercourse       | 60  | 55         | 91.7       |
| <b>Secondary Outcomes</b>   |     |            |            |
| FSDStotal BM                |     |            |            |
| Intervention                | 112 | 29         | 25.9       |
| Care-as-usual               | 117 | 30         | 25.6       |
| FSDStotal 1M                |     |            |            |
| Intervention                | 107 | 54         | 50.5       |
| Care-as-usual               | 110 | 49         | 44.5       |
| FSDStotal 3M                |     |            |            |
| Intervention                | 106 | 49         | 46.2       |
| Care-as-usual               | 106 | 45         | 42.5       |
| FSDStotal 6M                |     |            |            |
| Intervention                | 98  | 43         | 43.9       |
| Care-as-usual               | 98  | 46         | 46.9       |
| FSDStotal 12M               |     |            |            |
| Intervention                | 94  | 42         | 44.7       |
| Care-as-usual               | 87  | 40         | 46.0       |
| MMQtotal 1M                 |     |            |            |
| Intervention                | 90  | 13         | 14.4       |
| Care-as-usual               | 84  | 16         | 19.0       |
| MMQtotal 3M                 |     |            |            |
| Intervention                | 89  | 16         | 18.0       |
| Care-as-usual               | 80  | 15         | 18.8       |

**Supplementary appendix 6 Continued**

|                     |     |    |      |
|---------------------|-----|----|------|
| MMQtotal 6M         |     |    |      |
| Intervention        | 83  | 17 | 20.5 |
| Care-as-usual       | 72  | 11 | 15.3 |
| MMQtotal 12M        |     |    |      |
| Intervention        | 78  | 15 | 19.2 |
| Care-as-usual       | 66  | 13 | 19.7 |
| HADStotal 1M        |     |    |      |
| Intervention        | 107 | 32 | 29.9 |
| Care-as-usual       | 107 | 33 | 30.8 |
| HADStotal 3M        |     |    |      |
| Intervention        | 105 | 33 | 31.4 |
| Care-as-usual       | 106 | 27 | 25.5 |
| HADStotal 6M        |     |    |      |
| Intervention        | 98  | 27 | 27.6 |
| Care-as-usual       | 98  | 31 | 31.6 |
| HADStotal 12M       |     |    |      |
| Intervention        | 94  | 21 | 22.3 |
| Care-as-usual       | 87  | 21 | 24.1 |
| HADS depression 1M  |     |    |      |
| Intervention        | 107 | 28 | 26.2 |
| Care-as-usual       | 107 | 28 | 26.2 |
| HADS depression 3M  |     |    |      |
| Intervention        | 105 | 25 | 23.8 |
| Care-as-usual       | 106 | 20 | 18.9 |
| HADS depression 6M  |     |    |      |
| Intervention        | 98  | 22 | 22.4 |
| Care-as-usual       | 98  | 21 | 21.4 |
| HADS depression 12M |     |    |      |
| Intervention        | 94  | 21 | 22.3 |
| Care-as-usual       | 87  | 16 | 18.4 |
| HADS anxiety 1M     |     |    |      |
| Intervention        | 107 | 41 | 38.3 |
| Care-as-usual       | 107 | 38 | 35.5 |
| HADS anxiety 3M     |     |    |      |
| Intervention        | 105 | 43 | 41.0 |
| Care-as-usual       | 106 | 41 | 38.7 |
| HADS anxiety 6M     |     |    |      |
| Intervention        | 98  | 37 | 37.8 |
| Care-as-usual       | 98  | 35 | 35.7 |
| HADS anxiety 12M    |     |    |      |
| Intervention        | 94  | 31 | 33.0 |
| Care-as-usual       | 87  | 36 | 41.4 |

*Note.* BM = baseline measurement; FSFI = Female Sexual Function Index; FSDS = Female Sexual Distress Scale; HADS = Hospital Anxiety and Depression Scale; M = months; MMQ = Maudsley Marital Questionnaire; N = observed number of women at the specific timepoint (for the MMQ, this number only includes women with a partner).

\* = women that scored above/below the clinical cut-off point.
